# Supplementary material for: A Molecular Hybrid of the GFP Chromophore and 2,2′-Bipyridine: An Accessible Sensor for Zn2+ Detection with Fluorescence Microscopy
Source: MDPI journal article supplement (doi:10.3390/ijms25063504), 2024-03-20
Supplement: s1 [file s1]

## Supplementary information for

### A molecular hybrid of the GFP chromophore and 2,2'-bipyridine: an accessible sensor for Zn<sup>2+</sup> detection with fluorescence microscopy

Attila Csomos<sup>1,2</sup>, Miklós Madarász<sup>3</sup>, Gábor Turczel<sup>4</sup>, Levente Cseri<sup>3,5</sup>, Gergely Katona,<sup>6</sup> Balázs J. Rózsa,<sup>3,6,7,\*</sup>  
Ervin Kovács,<sup>6,8,\*</sup> and Zoltán Mucsi<sup>1,3,9</sup>

<sup>1</sup> Department of Chemistry, Femtonics Ltd., Tűzoltó utca 59, H-1094 Budapest, Hungary

<sup>2</sup> Hevesy György PhD School of Chemistry, Eötvös Loránd University, Pázmány Péter sétány 1/A, H-1117 Budapest, Hungary

<sup>3</sup> BrainVisionCenter, Liliom utca 43, H-1094 Budapest, Hungary

<sup>4</sup> NMR Research Laboratory, HUN-REN Research Centre for Natural Sciences, Magyar Tudósok körútja 2, H-1117 Budapest

<sup>5</sup> Department of Organic Chemistry & Technology, Budapest University of Technology & Economics, 3. Muegyetem rakpart, H-1111 Budapest, Hungary Budapest, Hungary

<sup>6</sup> Two-Photon Measurement Technology Research Group, Pázmány Péter Catholic University, Práter u. 50/a, H-1083 Budapest, Hungary

<sup>7</sup> Laboratory of 3D Functional Network and Dendritic Imaging, Institute of Experimental Medicine, Szigony u. 43, H-1083 Budapest, Hungary

<sup>8</sup> Polymer Chemistry and Physics Research Group, HUN-REN Research Centre for Natural Sciences, Magyar Tudósok körútja 2, H-1117 Budapest, Hungary

<sup>9</sup> Faculty of Materials and Chemical Sciences, University of Miskolc, H-3515 Miskolc, Hungary

\* Correspondence: kovacs.ervin@ttk.hu (E.K.); zoltan.mucsi@uni-miskolc.hu (Z.M.)

## Table of Contents

|                                                  |    |
|--------------------------------------------------|----|
| 1. NMR and HRMS spectra of GFZnP BIPY .....      | 2  |
| 2. Additional spectroscopic data .....           | 8  |
| 3. Additional biological data .....              | 10 |
| 4. Theoretical studies .....                     | 13 |
| 4.1 Raw computational data .....                 | 16 |
| 4.2 The coordinates of computed geometries ..... | 17 |

# 1. NMR and HRMS spectra of GFZnP BIPY

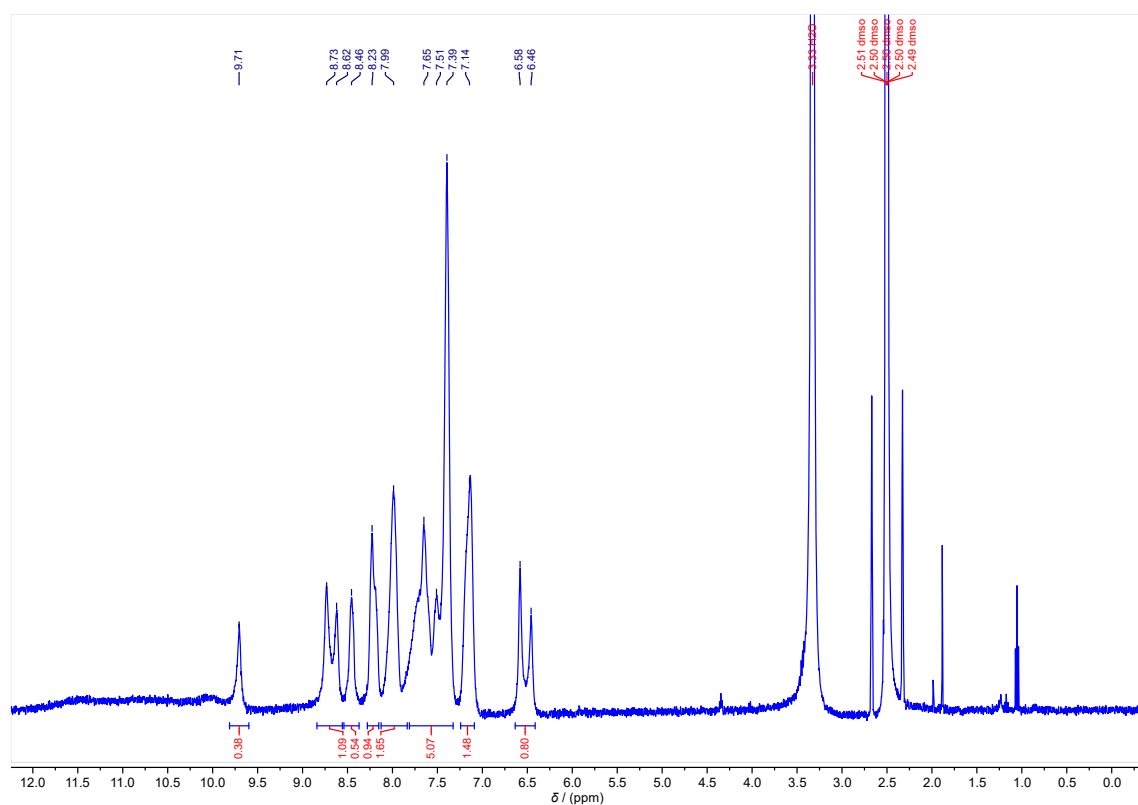

Fig. S1. <sup>1</sup>H NMR spectrum of GFZnP BIPY complex recorded at 400 MHz in DMSO-*d*<sub>6</sub>.

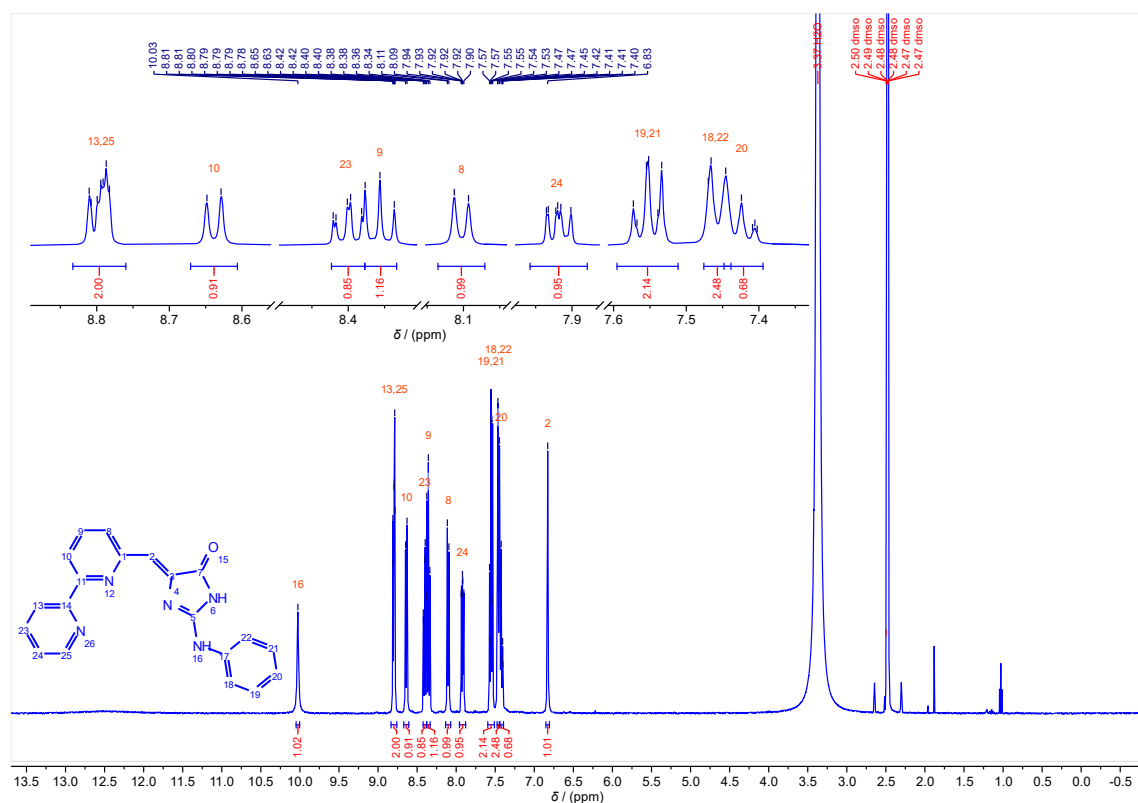

Fig. S2. <sup>1</sup>H NMR spectrum of GFZnP BIPY - Zn<sup>2+</sup> complex recorded at 400 MHz in DMSO-*d*<sub>6</sub>.

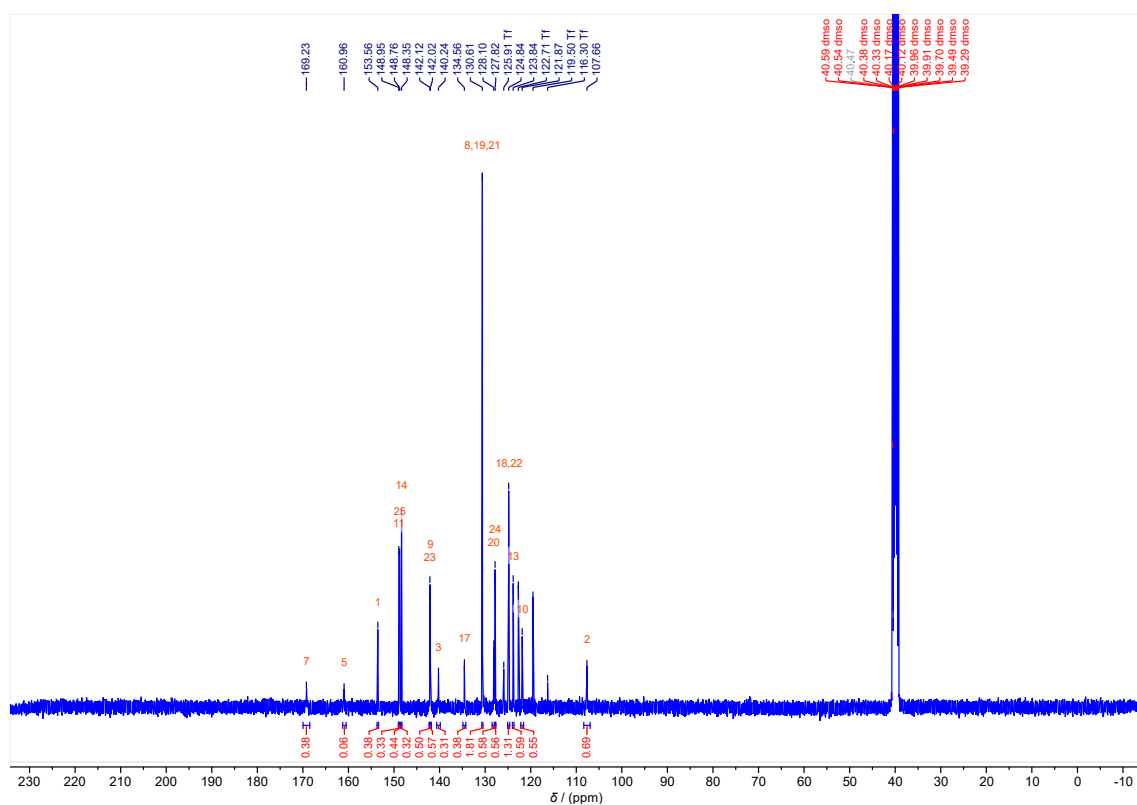

Fig. S3.  $^{13}\text{C}$  NMR spectrum of GFZnP BIPY -  $\text{Zn}^{2+}$  complex recorded at 101 MHz in  $\text{DMSO-}d_6$ .

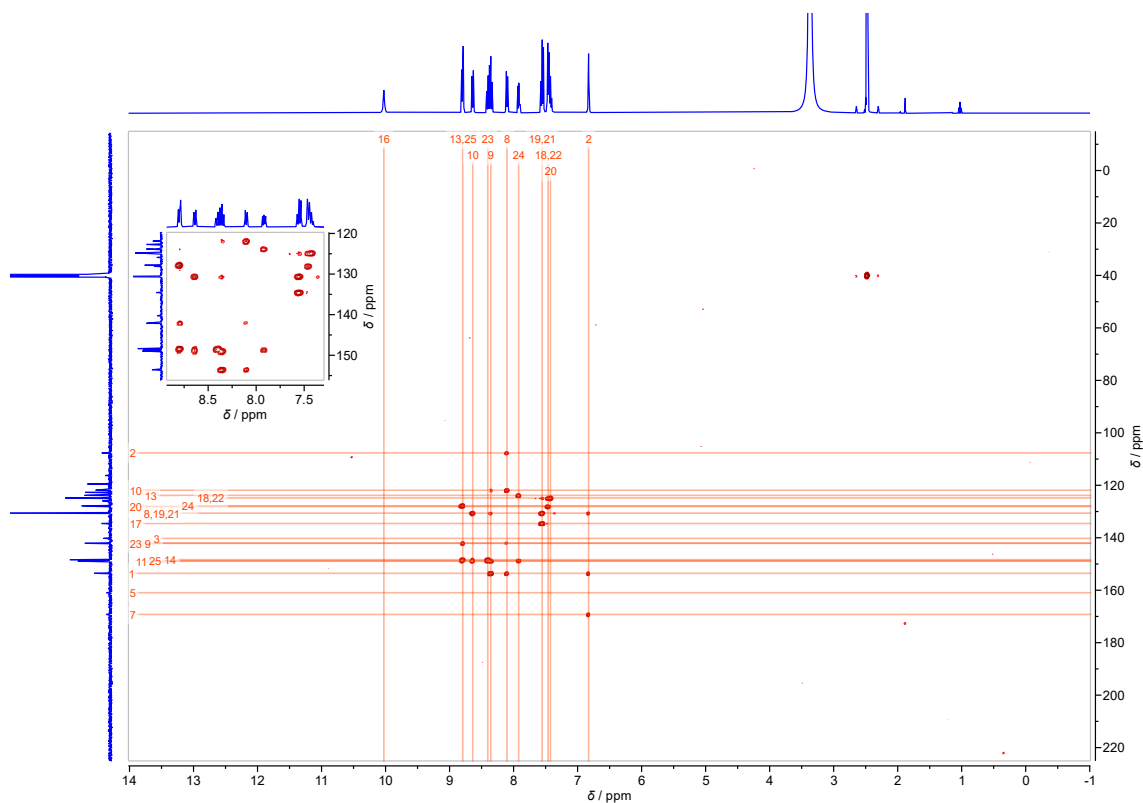

Fig. S4. HSQC spectrum of GFZnP BIPY -  $\text{Zn}^{2+}$  complex recorded at 400 MHz in  $\text{DMSO-}d_6$ .

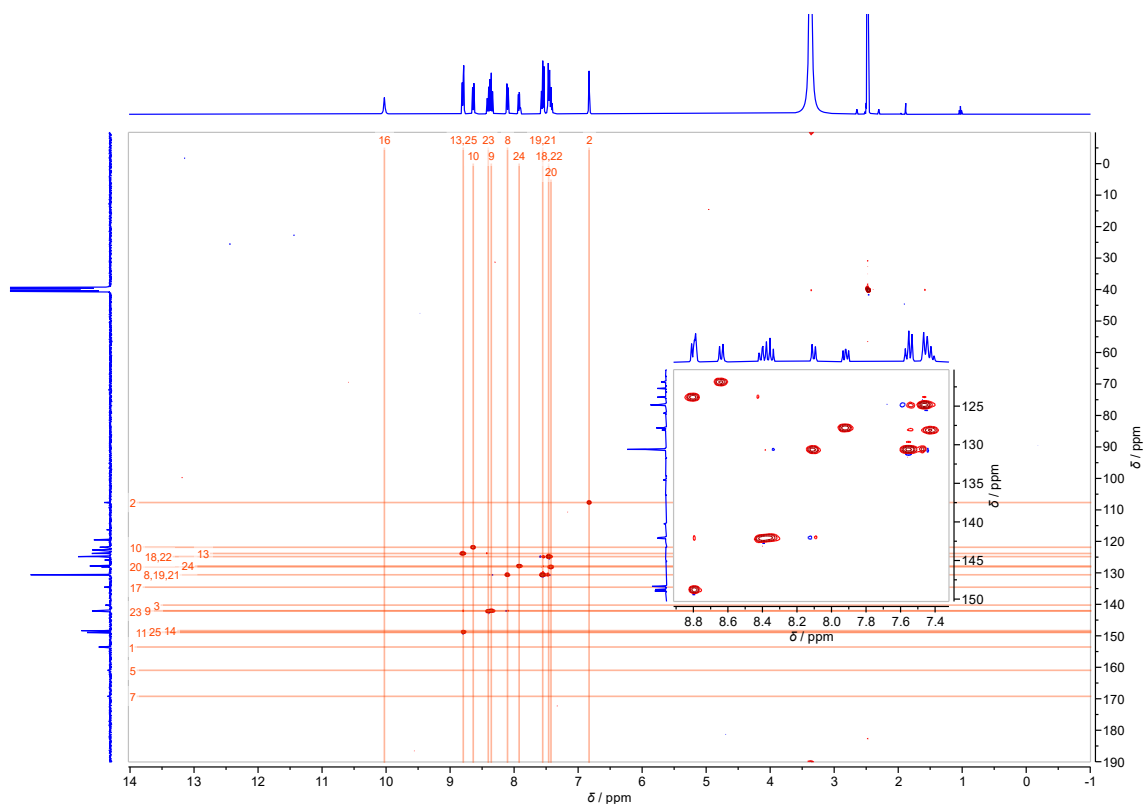

Fig. S5. HMBC spectrum of GFZnP BIPY -  $\text{Zn}^{2+}$  complex recorded at 400 MHz in  $\text{DMSO}-d_6$ .

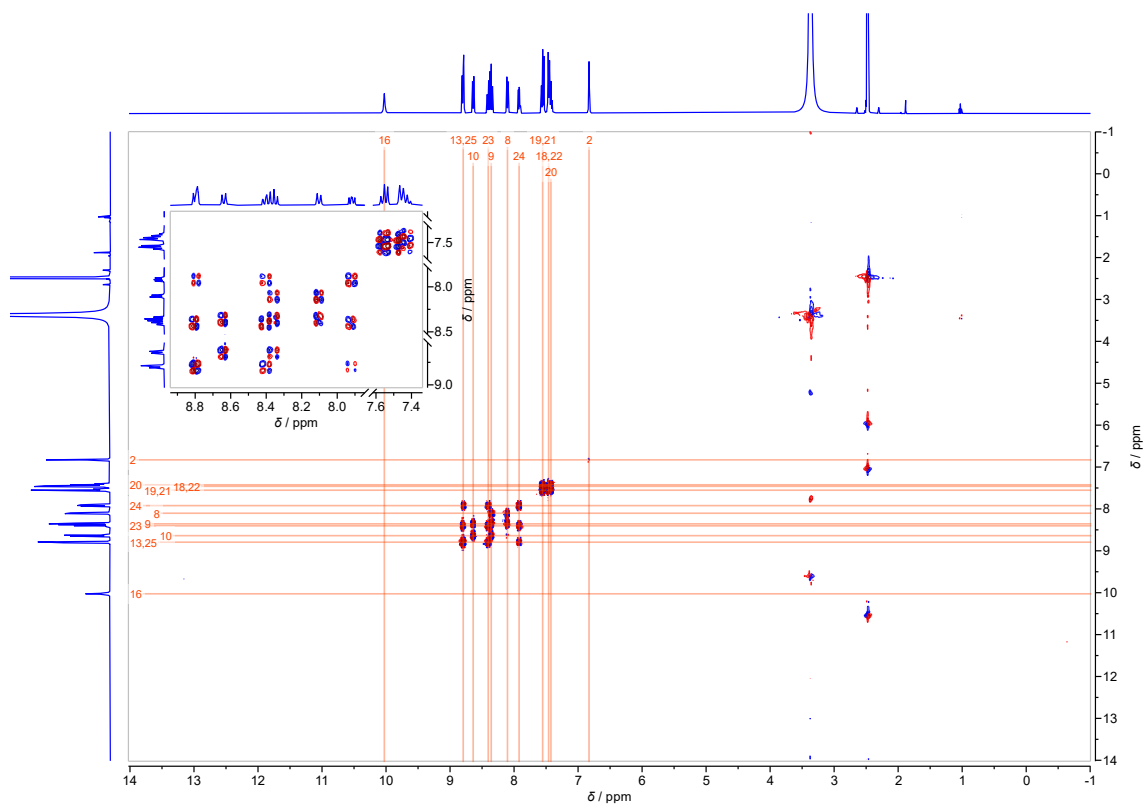

Fig. S6. COSY spectrum of GFZnP BIPY -  $\text{Zn}^{2+}$  complex recorded at 400 MHz in  $\text{DMSO}-d_6$ .

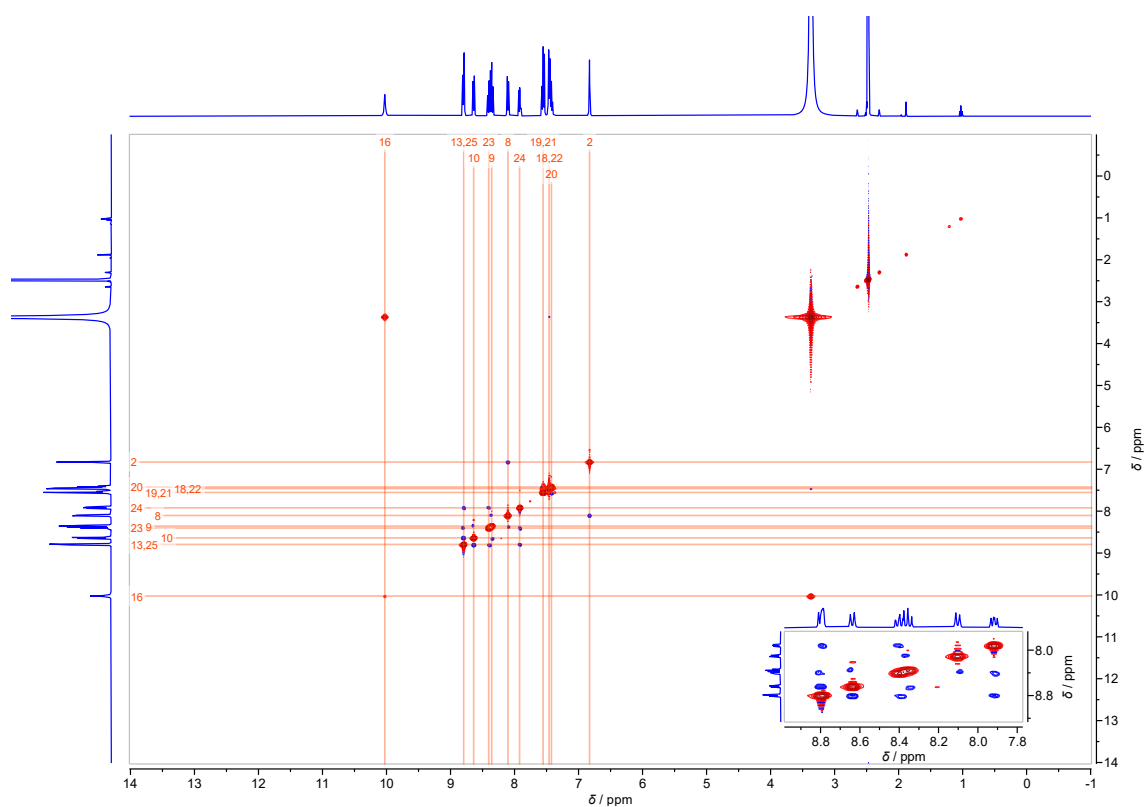

Fig. S7. ROESY spectrum of GFZnP BIPY -  $\text{Zn}^{2+}$  complex recorded at 400 MHz in  $\text{DMSO-}d_6$ .

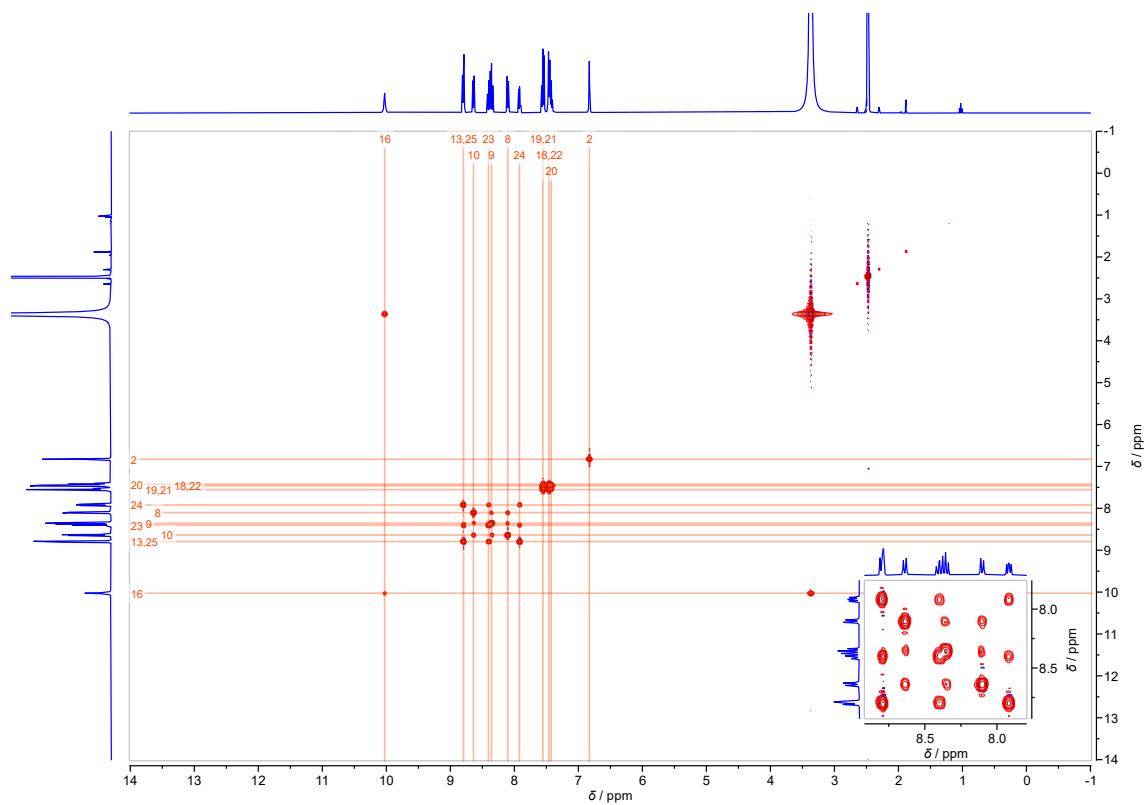

Fig. S8. TOCSY spectrum of GFZnP BIPY -  $\text{Zn}^{2+}$  complex recorded at 400 MHz in  $\text{DMSO-}d_6$ .

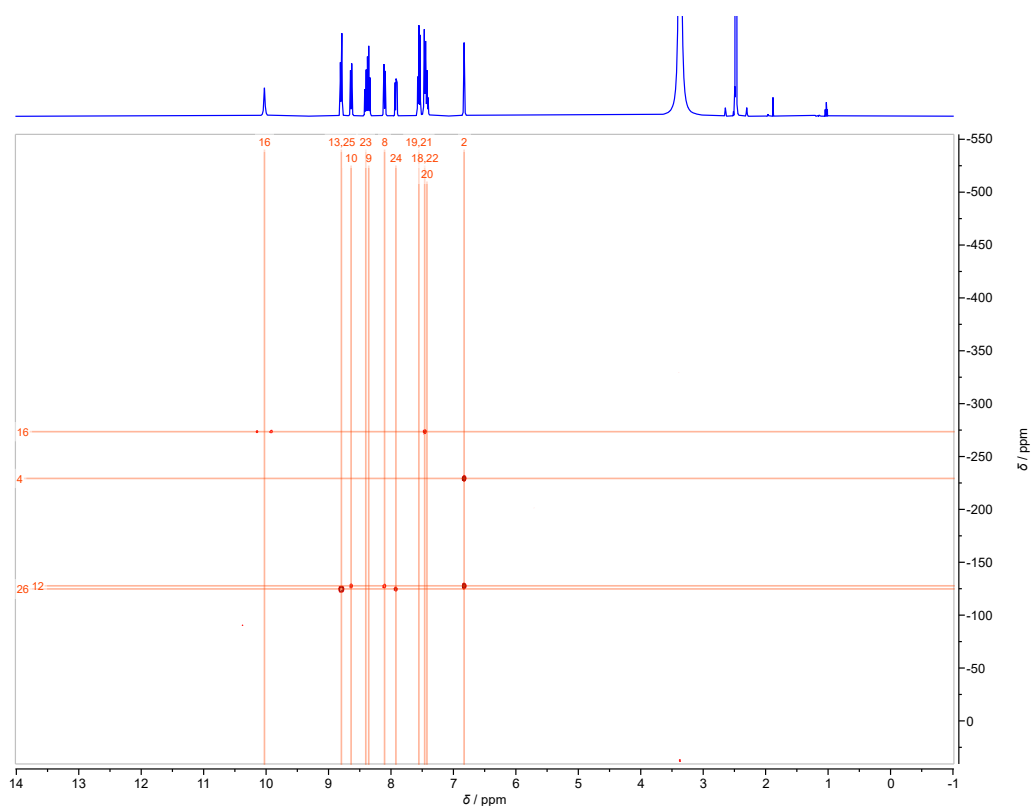

Fig. S9.  $^{15}\text{N}$  HMBC spectrum of GFZnP BIPY -  $\text{Zn}^{2+}$  complex recorded at 41 MHz in  $\text{DMSO-}d_6$ .

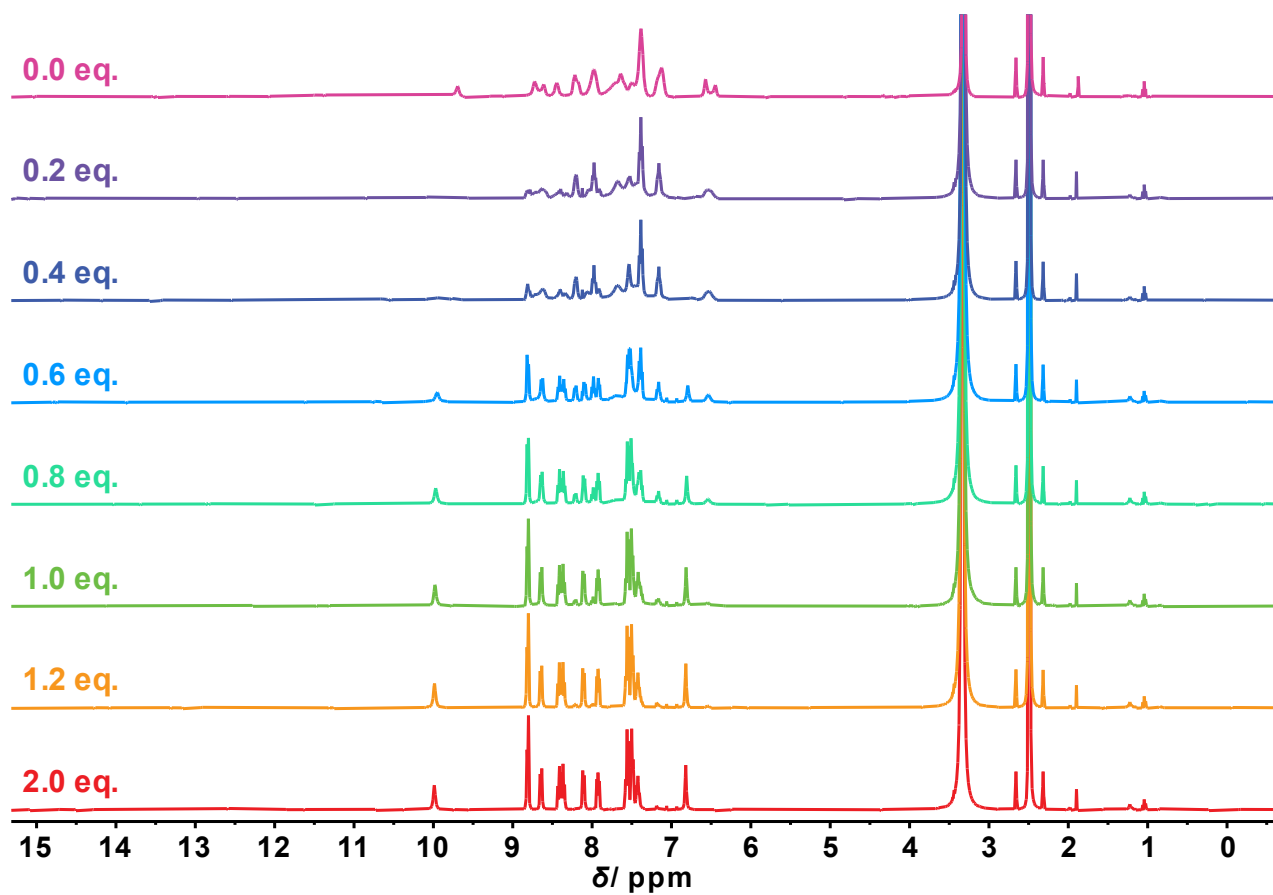

Fig. S10. Zoomed out NMR spectra of solutions of GFZnP BIPY in  $\text{DMSO-}d_6$  containing different amounts of  $\text{Zn}^{2+}$  recorded at 400 MHz.

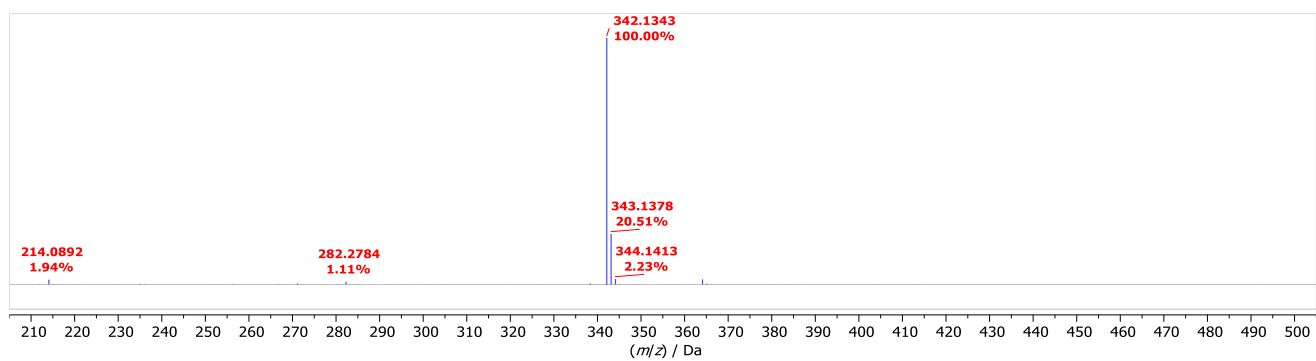

Fig. S11. HRMS spectrum of GFZnP BIPY.

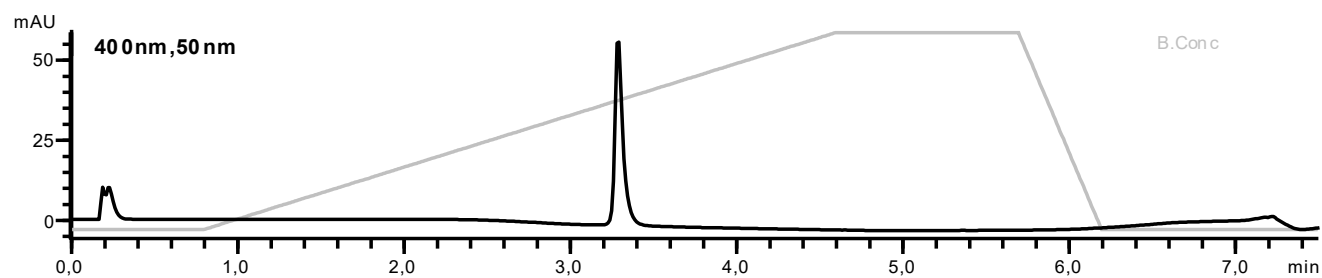

Fig. S12. HPLC-DAD chromatogram of GFZnP BIPY detected in the 350 - 450 nm absorption range, after 4 months of storage at room temperature in a 5 mM DMSO:EtOH 1:1 solution.

## 2. Additional spectroscopic data

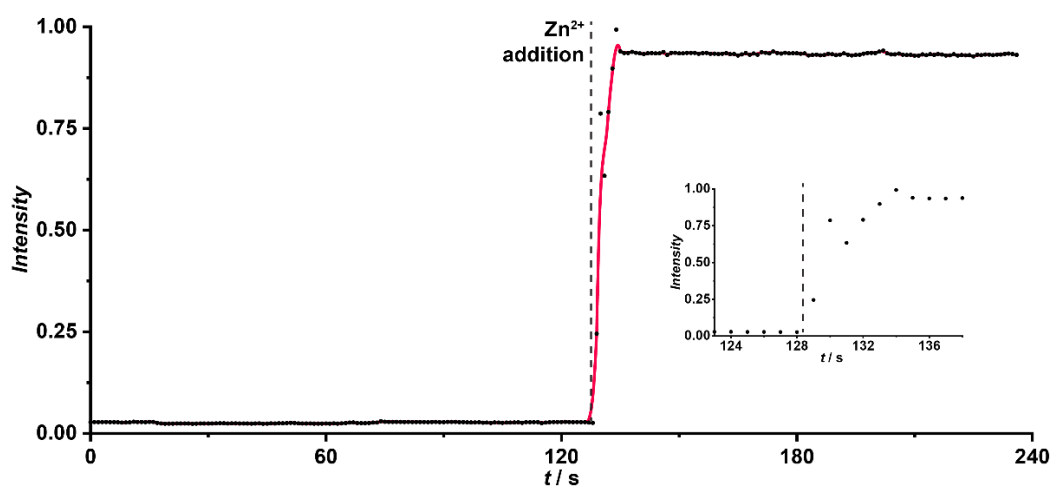

Fig. S13. Binding kinetics of the reported probe represented by a 4-minute time course measurement of 4  $\mu\text{M}$  GFZnP BIPY in HEPES pH 7.4 buffer to which concentrated  $\text{Zn}(\text{OTf})_2$  solution was added (100x dilution from a 100 mM  $\text{Zn}^{2+}$  solution in deionized water, resulting in a 1 mM final concentration).

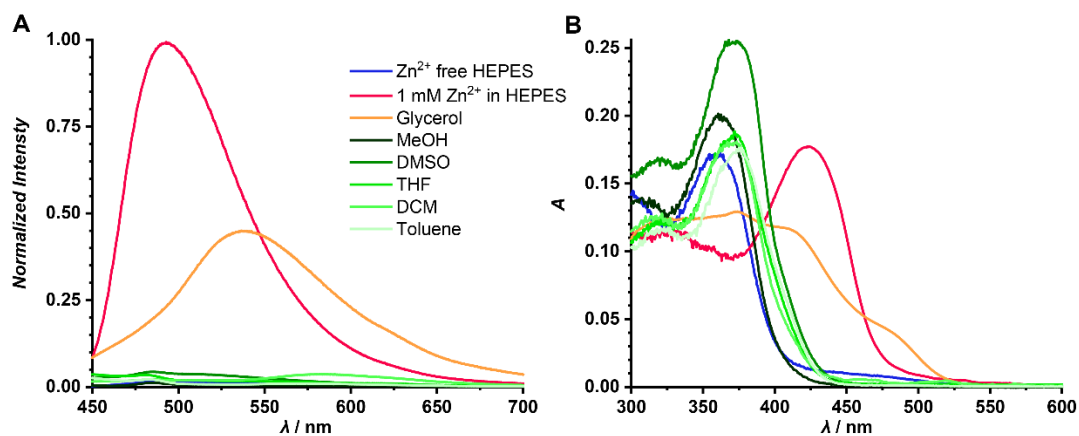

Fig. S14. (A) normalized fluorescence spectra and (B) absorption spectra of 4  $\mu\text{M}$  GFZnP BIPY in different solvents.

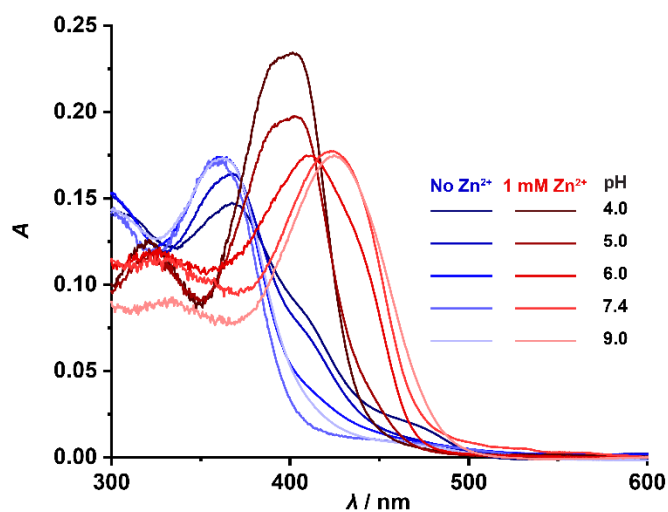

Fig. S15. Absorption spectra of 4  $\mu\text{M}$  GFZnP BIPY in free (blue) and 1 mM  $\text{Zn}^{2+}$  containing (red) pH buffers.



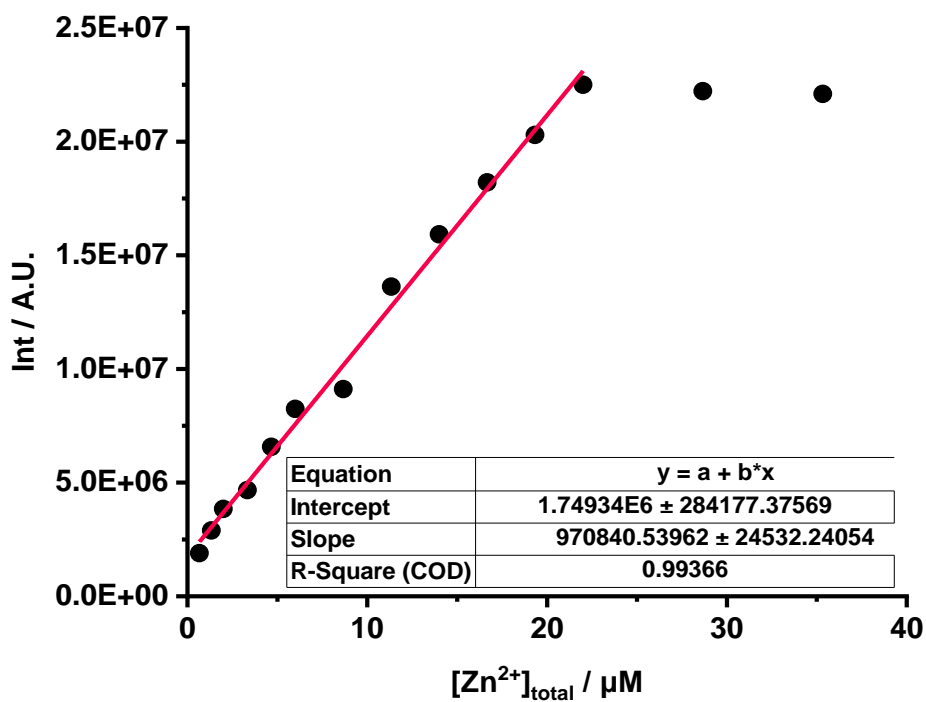

Fig. S16. Calibration line obtained by recording the fluorescence of GFZnP BIPY (33.3 μM in HEPES pH 7.4) in the presence of different quantities of total Zn<sup>2+</sup> and the parameters of the fitted calibration line.

$$F_0 = 1894834, \sigma = 8933, s = 970840$$

$$LOD = (F_0 + 3\sigma / s) = 1.98 \mu M = 129 \mu g / L$$

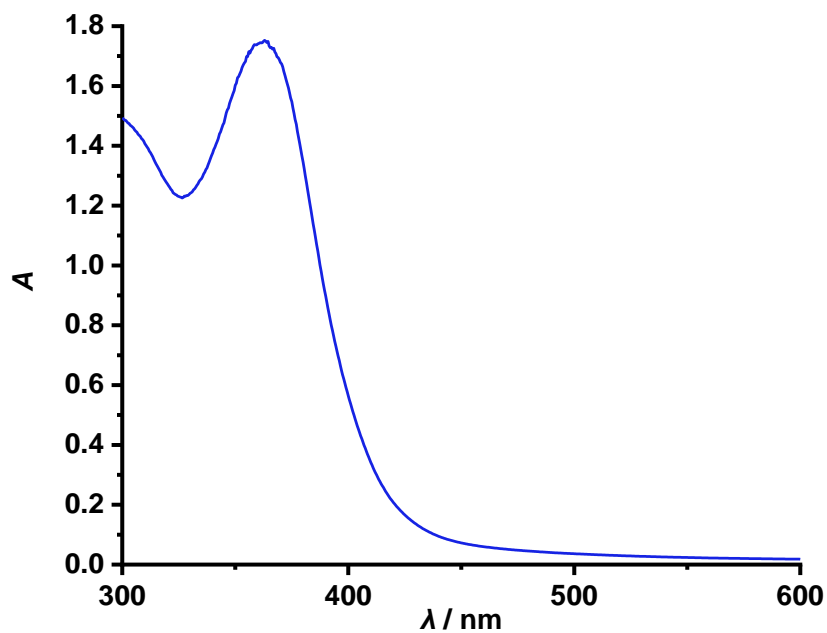

Fig. S17. Absorption spectrum of an aqueous saturated solution of GFZnP BIPY used for the determination of solubility.

### 3. Additional biological data

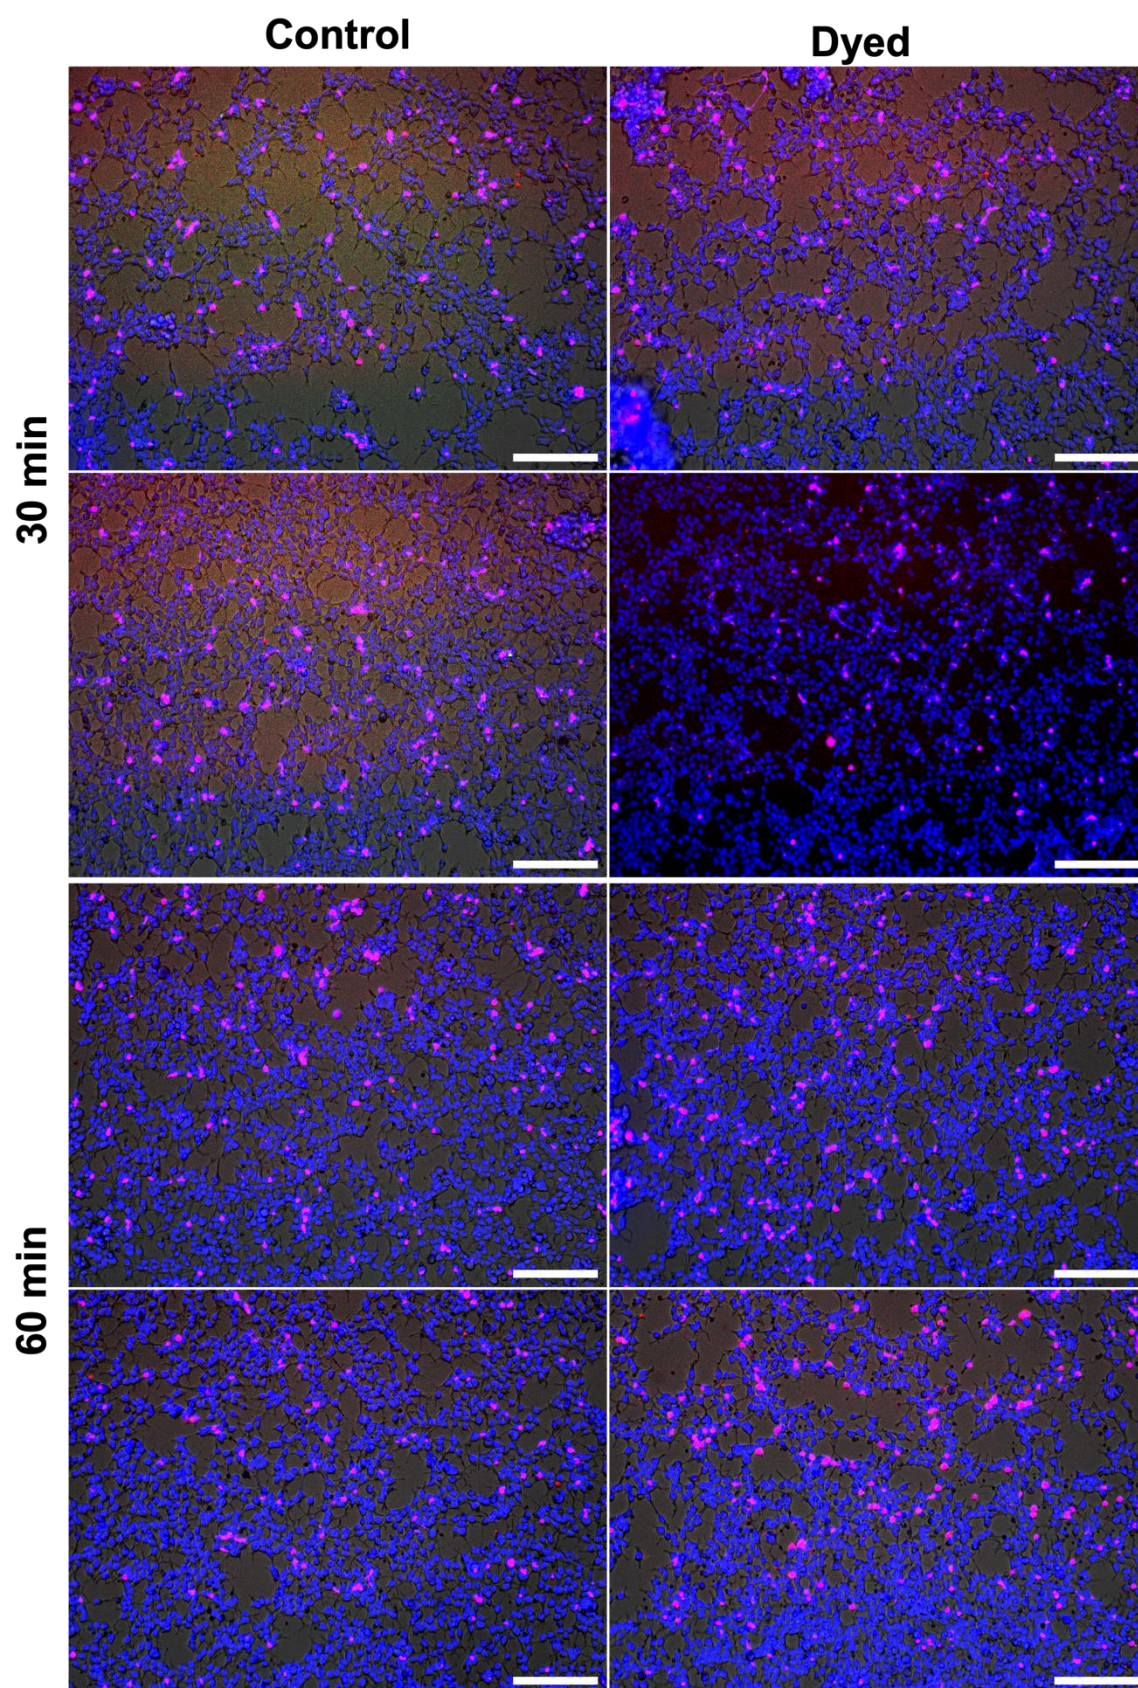

Fig. S18. Composite images of control and GFZnP BIPY dyed HEK293 cells 30 and 60 minutes after staining. Blue channel: Hoechst 33342, red channel: propidium iodide. Scale bars represent 200  $\mu\text{m}$ .



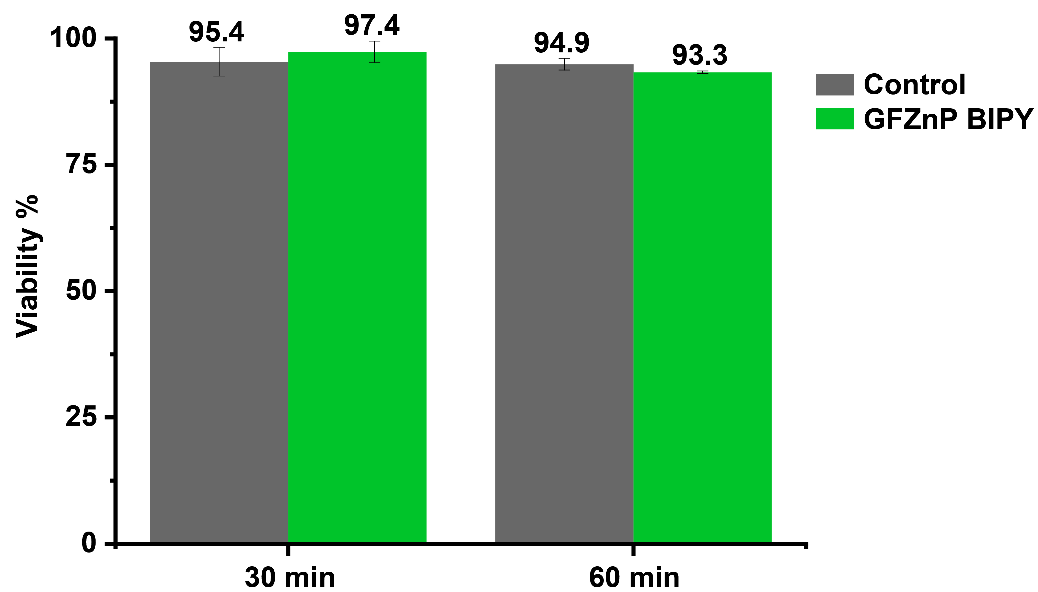

Fig. S19. Cell viabilities of HEK 293 cells stained with GFZnP BIPY measured 30 and 60 minutes after the staining. For both measurement lengths, one sample 10x magnification image was taken from two unstained control wells and two stained wells of a 24-well plate. Error bars represent the standard deviation. Each field of view contained 1441 – 2568 cells.

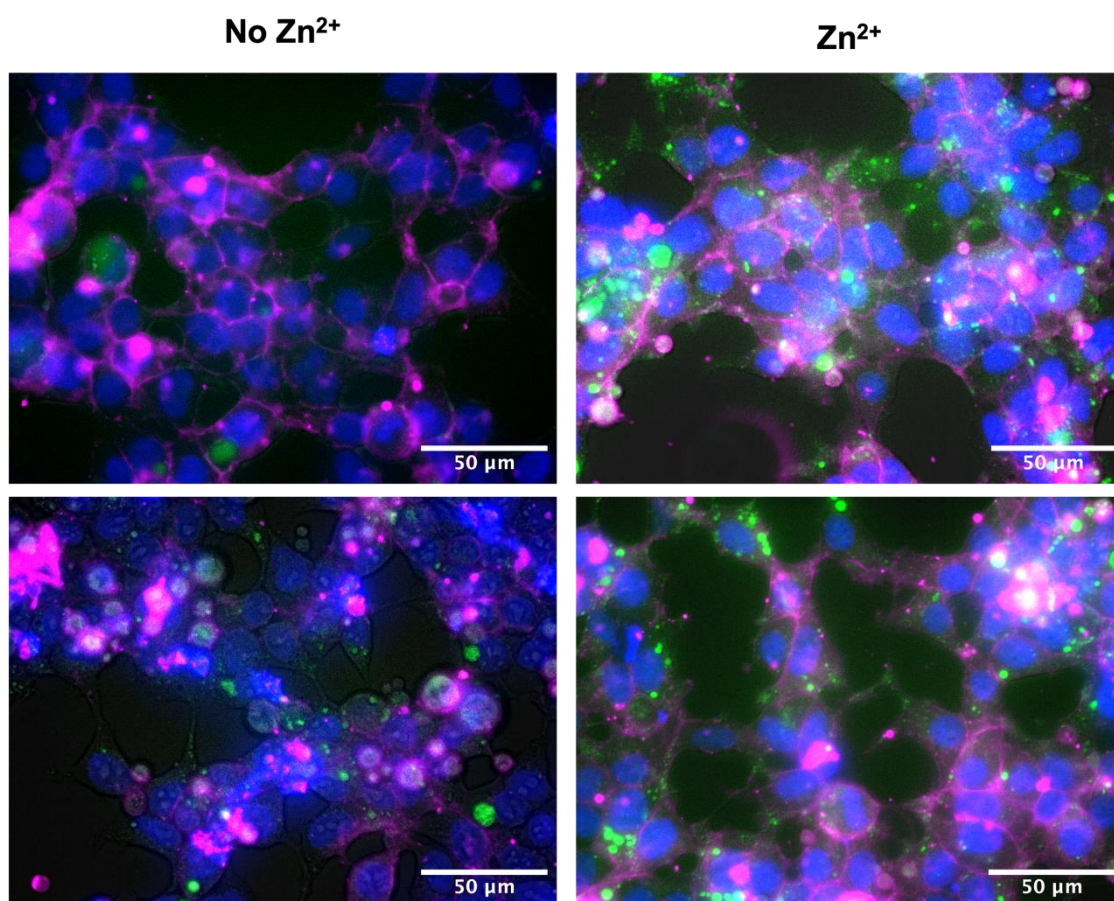

Fig. S20. Colocalization study of GFZnP BIPY (green), with the nuclei (blue) and cell membranes (purple).

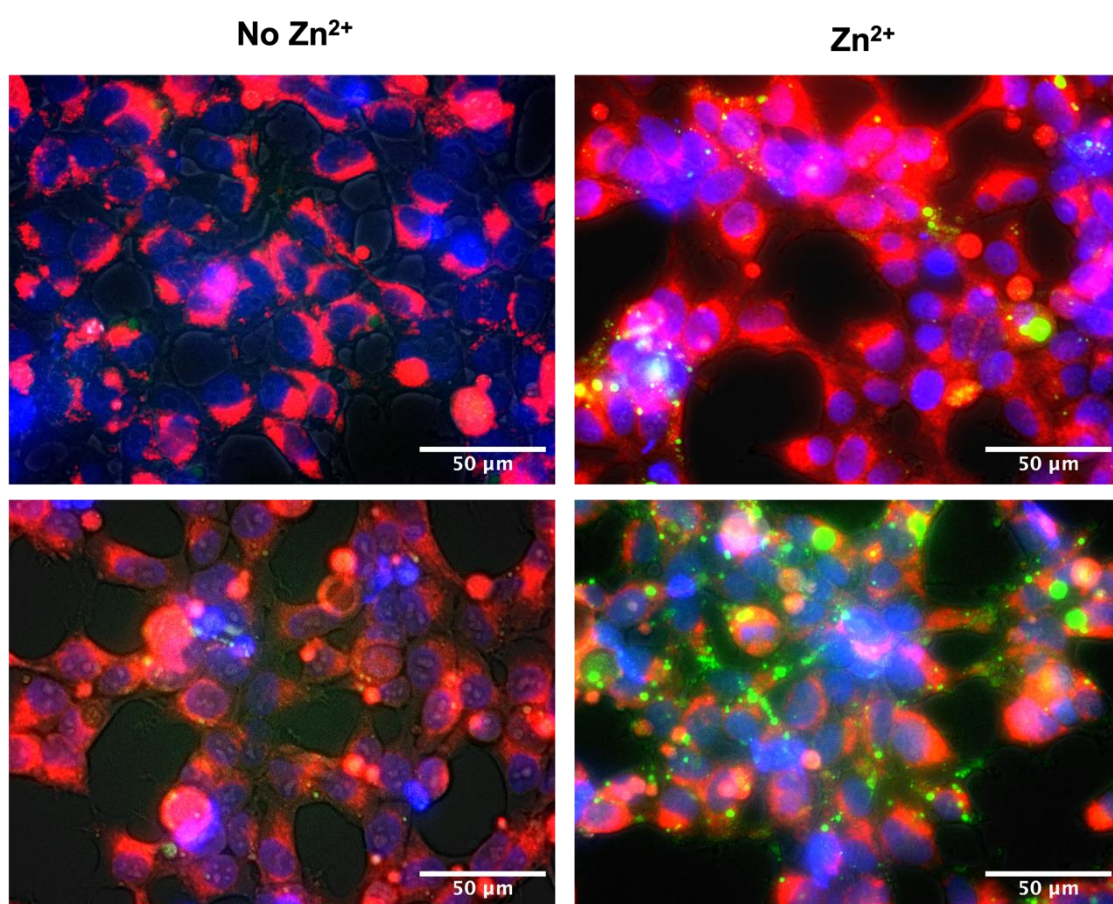

Fig. S21. Colocalization study of GFZnP BIPY (green), with the nuclei (blue) and mitochondria (red).

#### 4. Theoretical studies

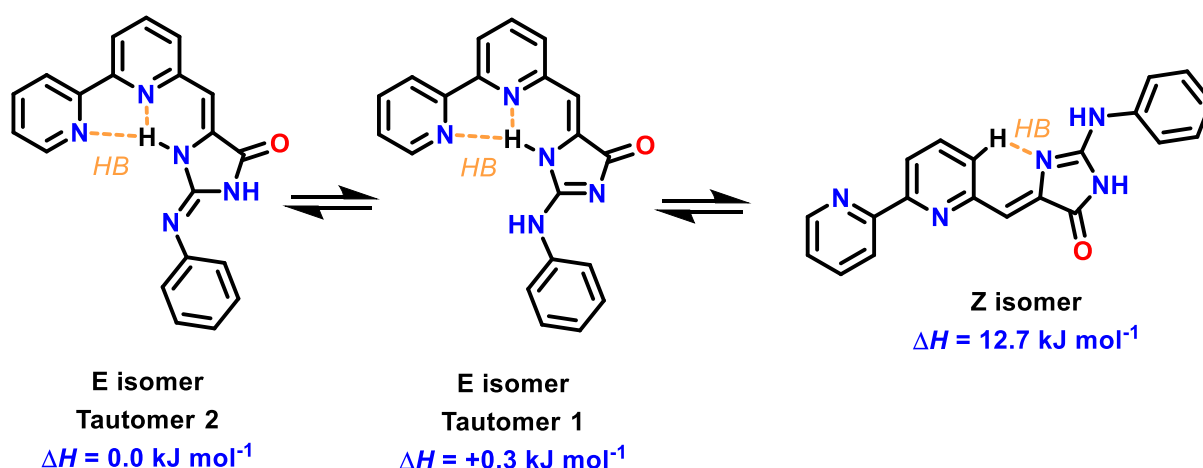

Scheme S1.  $\Delta H$  difference between different *E* and *Z* geometries in the case **GFZnP BIPY**. Yellow lines show hydrogen bonds (HB) with stabilizing effects, that determine the most stable probe geometry. Calculation was carried out at M06-2X/6-311++G(2d,2p)/PCM(water) level of theory.

To model the complex formation, DFT calculations were used. The stability of each possible complex was estimated by the enthalpy of its formation from the most stable conformer of the free probe and a hexahydrate of  $\text{Zn}^{2+}$  as shown below:

Only complexation (Complex A, B, D):  $\text{Zn}^{2+}(\text{H}_2\text{O})_6 + \text{L-H} \rightarrow [\text{L-H-Zn}]^{2+} + 6 \text{H}_2\text{O}$

$$\Delta H_c = (H_{[\text{L-H-Zn}]^{2+}} + 6H_{\text{H}_2\text{O}}) - (H_{[\text{L-H}]} + H_{\text{Zn}^{2+}(\text{H}_2\text{O})_6})$$

Complexation + deprotonation (Complex C, E, F):

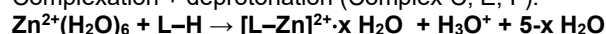

$$\Delta H_c = [H_{[\text{L-Zn}]^{2+} \cdot x \text{H}_2\text{O}} + (5-x)H_{\text{H}_2\text{O}} + H_{\text{H}_3\text{O}^+}] - (H_{[\text{L-H}]} + H_{\text{Zn}^{2+}(\text{H}_2\text{O})_6})$$

The free probe and complex were calculated at M06-2X/6-311++G(2d,2p)/PCM(water) level of theory. In these models, we needed to accurately predict the enthalpy of protonation ( $H_{\text{H}_3\text{O}^+}$ ) and desolvation ( $H_{\text{H}_2\text{O}}$ ) accurately. To earn this, modelling water and oxonium ions alone would not be enough, since in a condensed face both create stable hydrogen bonds with surrounding molecules, that need to be considered during the model creation. An accurate way to predict these quantities is to consider a multitude of water molecules from which a single water molecule is removed ( $H_{\text{H}_2\text{O}}$ ) or to which a proton is added ( $H_{\text{H}_3\text{O}^+}$ ). The formation enthalpy of water was modelled using an 8-membered water cluster from which a single water molecule is removed as shown in **Scheme S2**.

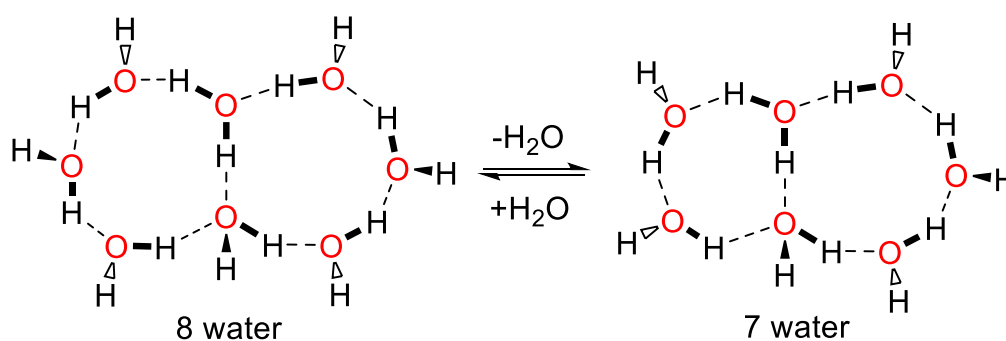

Scheme S2. The 8-membered waters clusters used for modelling solvation.

Table S1. Computed thermodynamic quantities of the 8-membered water clusters used for modelling solvation. ZPE is the zero point energy, calculated at M06-2X/6-311++G(2d,2p) level of theory.

| Quantity             | $\Delta E$   | $\Delta \text{ZPE}$ | $\Delta U$ | $\Delta H$ | $\Delta G$ | $\Delta S$ |
|----------------------|--------------|---------------------|------------|------------|------------|------------|
| $\text{kJ mol}^{-1}$ | -200503.7    | -200438.6           | -200430.9  | -200430.9  | -200452.4  | 71.96      |
| Hartree              | -76.44060235 | -76.415791          | -76.412864 | -76.412863 | -76.421042 | 71.96      |

Analogously, a proton was added to the same 8-membered cluster to model the effect of deprotonation as shown in Scheme S3.

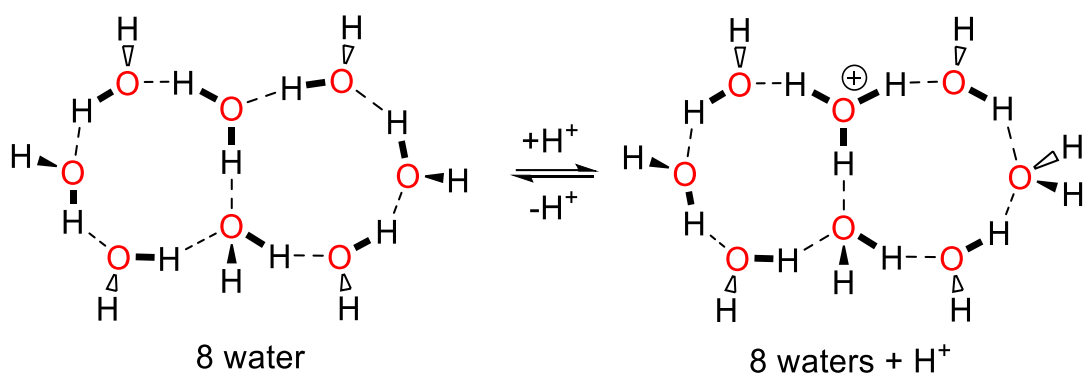

Scheme S3. The 8-membered waters clusters used for the proton solvation.

Table S2. Computed thermodynamic quantities of the 8-membered water clusters used for modelling the protonation. ZPE is the zero point energy, calculated at M06-2X/6-311++G(2d,2p) level of theory.

| Quantity             | $\Delta E$  | $\Delta ZPE$ | $\Delta U$ | $\Delta H$ | $\Delta G$ | $\Delta S$ |
|----------------------|-------------|--------------|------------|------------|------------|------------|
| $\text{kJ mol}^{-1}$ | -1131.9     | -1100.9      | -1103.5    | -1103.5    | -1095.6    | -26.2      |
| Hartree              | -0.43152309 | -0.419694    | -0.420683  | -0.420684  | -0.417706  | -26.2      |

The calculated  $\Delta H$  values and the optimized probe and complex geometries are summarized in **Table S3**.

The protonation of heteroatoms in side-chains may further complicate the binding calculations, however, in this study we have not considered such effects.

**Table S3.** The sum enthalpy values relative to the free-form ( $\Delta H_c$ ) in  $\text{kJ mol}^{-1}$  for various complex models of selected probes calculated at M06-2X/6-311++G(2d,2p)//PCM(water) level of theory.  $\lambda_{\text{abs}}$  and  $\lambda_{\text{em}}$ ,  $\epsilon$  and *osc. str.* values were calculated at B3LYP/6-311++G(2d,2p)//PCM(water) level of theory, where *osc. str.* = oscillatory strength. Green fill color highlights the most stable species.

|                                                           | 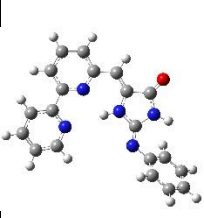 |  |  |  |  |  |  |                           |  |
|-----------------------------------------------------------|-----------------------------------------------------------------------------------|-----------------------------------------------------------------------------------|-----------------------------------------------------------------------------------|------------------------------------------------------------------------------------|-------------------------------------------------------------------------------------|-------------------------------------------------------------------------------------|-------------------------------------------------------------------------------------|--------------------------------------------------------------------------------------------------------------|-------------------------------------------------------------------------------------|
|                                                           | Free probe A<br>L-H                                                               | Free probe B<br>L-H<br>In accordance<br>with UV-VIS                               | Free probe C<br>L-H                                                               | Complex A<br>L-H : $\text{Zn}^{2+}$                                                | Complex B<br>$\text{L}^- : \text{Zn}^{2+}$                                          | Complex C<br>$\text{L}^- : \text{Zn}^{2+}$                                          | Complex D<br>L-H : $\text{Zn}^{2+} : 3 \text{ H}_2\text{O}$                         | Complex E<br>$\text{L}^- : \text{Zn}^{2+} : 3 \text{ H}_2\text{O}$<br>In accordance<br>with NMR & UV-<br>VIS | Complex F<br>$\text{L}^- : \text{Zn}^{2+} : 3 \text{ H}_2\text{O}$                  |
| $\Delta H_c [\text{kJ mol}^{-1}]$                         | 0.0                                                                               | 0.3                                                                               | 12.7                                                                              | -69.7                                                                              | -40.4                                                                               | -40.7                                                                               | -121.5                                                                              | -82.9                                                                                                        | -107.9                                                                              |
| $\lambda_{\text{abs}} [\text{nm}]$<br>( <i>osc str.</i> ) | Max 408<br>413 (0.918)                                                            | Max 394<br>403 (0.983)                                                            | 423 (1.152)                                                                       | 419 (0.801)                                                                        | max 438<br>477 (0.403)<br>424 (0.656)                                               | max 432<br>461 (0.526)<br>405 (0.637)                                               | max 433<br>468 (0.577)<br>413 (0.567)                                               | max 420<br>425 (0.836)                                                                                       | max 441<br>469 (0.637)<br>418 (0.487)                                               |
| $\epsilon [\text{dm}^3 \text{ mol}^{-1} \text{ cm}^{-1}]$ | 38950                                                                             | 43200                                                                             | 47000                                                                             | 36000                                                                              | 37850                                                                               | 40700                                                                               | 39400                                                                               | 36950                                                                                                        | 38900                                                                               |
| $\lambda_{\text{em}} [\text{nm}]$<br>( <i>osc str.</i> )  | 440 (0.769)                                                                       | 472 (0.993)                                                                       | 516 (1.18)                                                                        | 469 (0.162)                                                                        | max 519 (0.237)                                                                     | max 432 (0.257)                                                                     | 454 (0.729)                                                                         | 524 (0.976)                                                                                                  | 586 (0.900)<br>470 (0.201)                                                          |

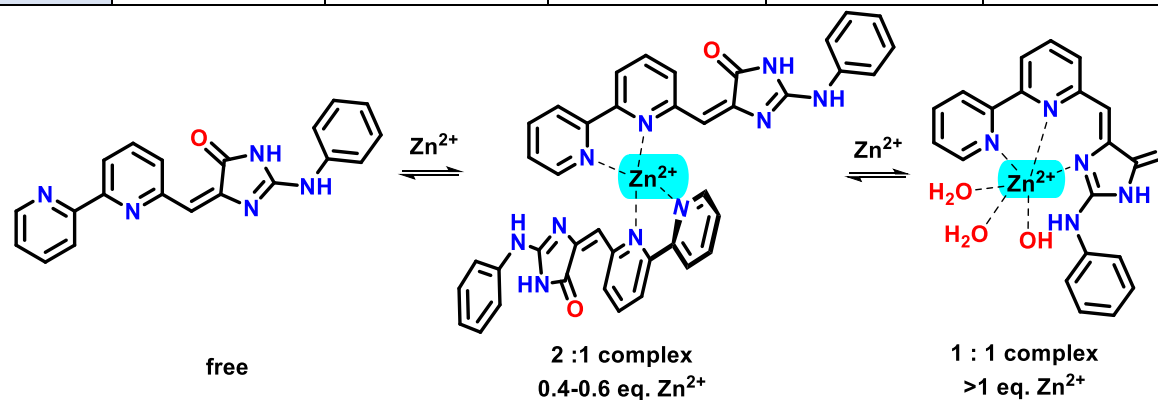

Fig. S22. Hypothesized complex equilibrium and complex structures of GFZnP BIPY at different  $\text{Zn}^{2+}$  equivalency (0.4-0.6 eq. and >1. eq.).

#### 4.1 Raw computational data

**Table S4.** Computed energies (*E*), zero point energies, internal energies (*U*), enthalpies (*H*) and Gibbs free energies (*G*) given in Hartree as well as entropies (*S*) given in J mol<sup>-1</sup> K<sup>-1</sup> at M06-2X/6-311++G(2d,2p) basis set with the consideration of PCM solvent method using the parameter set of water for **small molecules and ions**.

| Name                                             | Filename                                         | E              | ZPE          | U            | H            | G            | S       |
|--------------------------------------------------|--------------------------------------------------|----------------|--------------|--------------|--------------|--------------|---------|
| 7 H <sub>2</sub> O                               | 000aaa_5_H2O_+2H2O_M062X_6311++2d2p_PCMw.log     | -535.08135498  | -534.908272  | -534.889627  | -534.888683  | -534.956561  | 142.860 |
| 8 H <sub>2</sub> O                               | 000aaa_5_H2O_+3H2O_M062X_6311++2d2p_PCMw.log     | -611.52195733  | -611.324063  | -611.302491  | -611.301546  | -611.377603  | 160.075 |
| 8 H <sub>2</sub> O +H <sup>+</sup>               | 001aaa_5_H2O_+3H2O_+H+_M062X_6311++2d2p_PCMw.log | -611.95348042  | -611.743757  | -611.723174  | -611.722230  | -611.795309  | 153.808 |
| Zn <sup>2+</sup> (H <sub>2</sub> O) <sub>6</sub> | 000aaa_Zn2+_6H2O_M062X_6311++2d2p_PCMw.log       | -2237.69628717 | -2237.546664 | -2237.528735 | -2237.527791 | -2237.590689 | 132.381 |

**Table S5.** Computed energies (*E*), zero point energies, internal energies (*U*), enthalpies (*H*) and Gibbs free energies (*G*) given in Hartree as well as entropies (*S*) given in J mol<sup>-1</sup> K<sup>-1</sup> at M06-2X/6-311++G(2d,2p) basis set with the consideration of PCM solvent method using the parameter set of water for compound.

| Number              | Name                   | Filename                                                       | E              | ZPE          | U            | H            | G            | S       |
|---------------------|------------------------|----------------------------------------------------------------|----------------|--------------|--------------|--------------|--------------|---------|
| <b>free probe A</b> | isomer-E, tautomer-2,  | _801ace_GFP_bipiridil_M062X_6311++2d2p_PCMw.log                | -1120.07413551 | -1119.755437 | -1119.735233 | -1119.734289 | -1119.807811 | 154.740 |
| <b>free probe B</b> | isomer-E<br>tautomer-1 | _801abe_GFP_bipiridil_M062X_6311++2d2p_PCMw.log                | -1120.07440272 | -1119.755312 | -1119.735110 | -1119.734166 | -1119.807820 | 155.017 |
| <b>free probe C</b> | isomer-Z<br>tautomer-1 | _801aad_GFP_bipiridil_M06_2X_6311++2d2p_PCMw.log               | -1120.06950057 | -1119.750715 | -1119.730266 | -1119.729322 | -1119.804671 | 158.585 |
| <b>Complex A</b>    |                        | _803aae_GFP_bipiridil_Zn2+_M062X_6311++2d2p_PCMw.log           | -2899.15712235 | -2898.833503 | -2898.812282 | -2898.811338 | -2898.885204 | 155.463 |
| <b>Complex B</b>    |                        | _803bae_GFP_bipiridil-H+_Zn2+_M062X_6311++2d2p_PCMw.log        | -2898.71237664 | -2898.402631 | -2898.381573 | -2898.380629 | -2898.454350 | 155.159 |
| <b>Complex C</b>    |                        | _803bbe_GFP_bipiridil-H+_Zn2+_M062X_6311++2d2p_PCMw.log        | -2898.71243843 | -2898.401332 | -2898.380561 | -2898.379617 | -2898.452427 | 153.241 |
| <b>Complex D</b>    |                        | _804aae_GFP_bipiridil_Zn2+_+3H2O_M062X_6311++2d2p_PCMw.log     | -3128.49908251 | -3128.101036 | -3128.070629 | -3128.069685 | -3128.162989 | 196.375 |
| <b>Complex E</b>    |                        | _805aae_GFP_bipiridil-1H+_Zn2+_+3H2O_M062X_6311++2d2p_PCMw.log | -3128.05083664 | -3127.665069 | -3127.635221 | -3127.634277 | -3127.725978 | 193.001 |
| <b>Complex F</b>    |                        | _805abe_GFP_bipiridil-1H+_Zn2+_+3H2O_M062X_6311++2d2p_PCMw.log | -3128.05757617 | -3127.673159 | -3127.643487 | -3127.642543 | -3127.734174 | 192.854 |



## 4.2 The coordinates of computed geometries

### 7 membered water cluster : 000aaa\_5\_H2O\_+2H2O\_M062X\_6311++2d2p\_PCMw.log

orientation:

| Center<br>Number | Atomic<br>Number | Atomic<br>Type | Coordinates (Angstroms) |           |           |
|------------------|------------------|----------------|-------------------------|-----------|-----------|
|                  |                  |                | X                       | Y         | Z         |
| 1                | 8                | 0              | -1.587073               | -2.313966 | -0.024587 |
| 2                | 1                | 0              | -0.743333               | -1.972492 | 0.344442  |
| 3                | 8                | 0              | 0.671050                | -1.287793 | 1.087300  |
| 4                | 1                | 0              | 0.557219                | -0.324001 | 1.126061  |
| 5                | 8                | 0              | 0.432855                | 1.532116  | 0.965444  |
| 6                | 1                | 0              | -0.422202               | 1.787392  | 0.549524  |
| 7                | 8                | 0              | -1.928651               | 2.121810  | -0.183414 |
| 8                | 1                | 0              | -2.427043               | 1.292158  | -0.339418 |
| 9                | 8                | 0              | -3.261032               | -0.224602 | -0.567438 |
| 10               | 1                | 0              | -2.682621               | -0.990125 | -0.368506 |
| 11               | 8                | 0              | 2.642949                | 1.376802  | -0.722218 |
| 12               | 1                | 0              | 0.505142                | 2.037463  | 1.779151  |
| 13               | 1                | 0              | 3.358447                | 1.937413  | -0.412756 |
| 14               | 1                | 0              | -1.349704               | -2.807774 | -0.812936 |
| 15               | 1                | 0              | -4.038046               | -0.329436 | -0.013467 |
| 16               | 1                | 0              | 1.472496                | -1.421656 | 0.551173  |
| 17               | 1                | 0              | 1.893950                | 1.543483  | -0.121891 |
| 18               | 1                | 0              | -1.859609               | 2.555000  | -1.037517 |
| 19               | 8                | 0              | 3.008137                | -1.347256 | -0.465027 |
| 20               | 1                | 0              | 2.974528                | -0.388022 | -0.643557 |
| 21               | 1                | 0              | 2.934897                | -1.776275 | -1.320776 |

### 8 membered water cluster : 000aaa\_5\_H2O\_+3H2O\_M062X\_6311++2d2p\_PCMw.log

orientation:

| Center<br>Number | Atomic<br>Number | Atomic<br>Type | Coordinates (Angstroms) |           |           |
|------------------|------------------|----------------|-------------------------|-----------|-----------|
|                  |                  |                | X                       | Y         | Z         |
| 1                | 8                | 0              | -2.197939               | -2.273595 | -0.196220 |
| 2                | 1                | 0              | -1.374683               | -1.973630 | 0.249636  |
| 3                | 8                | 0              | -0.000568               | -1.385547 | 1.116234  |
| 4                | 1                | 0              | 0.003020                | -0.414690 | 1.118355  |
| 5                | 8                | 0              | -0.081445               | 1.451678  | 1.087843  |
| 6                | 1                | 0              | -0.921439               | 1.723197  | 0.650818  |
| 7                | 8                | 0              | -2.387585               | 2.134343  | -0.122215 |
| 8                | 1                | 0              | -2.907536               | 1.337812  | -0.360249 |
| 9                | 8                | 0              | -3.783679               | -0.121740 | -0.735667 |
| 10               | 1                | 0              | -3.239460               | -0.913022 | -0.539159 |
| 11               | 8                | 0              | 2.220624                | 2.224103  | -0.272164 |
| 12               | 1                | 0              | -0.105121               | 1.828409  | 1.971705  |
| 13               | 1                | 0              | 1.965157                | 2.699795  | -1.066108 |
| 14               | 1                | 0              | -1.915740               | -2.727879 | -0.993489 |
| 15               | 1                | 0              | -4.594476               | -0.226552 | -0.232409 |
| 16               | 1                | 0              | 0.843220                | -1.659891 | 0.712752  |
| 17               | 1                | 0              | 1.388284                | 1.989021  | 0.178075  |
| 18               | 1                | 0              | -2.272339               | 2.629883  | -0.936484 |
| 19               | 8                | 0              | 2.412464                | -2.208447 | -0.008087 |
| 20               | 1                | 0              | 2.935644                | -1.429045 | -0.282308 |
| 21               | 1                | 0              | 2.293055                | -2.734147 | -0.802450 |
| 22               | 8                | 0              | 3.818804                | 0.038022  | -0.729150 |
| 23               | 1                | 0              | 4.626694                | 0.169379  | -0.227432 |
| 24               | 1                | 0              | 3.270315                | 0.830827  | -0.565848 |

**hydrated Zn ion: 000aaa\_Zn2+\_6H2O\_M062X\_6311++2d2p\_PCMw.log**

orientation:

| Center<br>Number | Atomic<br>Number | Atomic<br>Type | Coordinates (Angstroms) |           |           |
|------------------|------------------|----------------|-------------------------|-----------|-----------|
|                  |                  |                | X                       | Y         | Z         |
| 1                | 30               | 0              | -0.000716               | -0.001877 | -0.006270 |
| 2                | 8                | 0              | 1.306408                | 1.088909  | 1.235839  |
| 3                | 1                | 0              | 1.898598                | 0.523166  | 1.744832  |
| 4                | 8                | 0              | -1.294355               | 1.643087  | -0.243744 |
| 5                | 1                | 0              | -1.913382               | 1.534864  | -0.975361 |
| 6                | 8                | 0              | 1.337334                | 0.504679  | -1.550789 |
| 7                | 1                | 0              | 1.023236                | 0.693619  | -2.441662 |
| 8                | 8                | 0              | -1.323860               | -1.015432 | -1.291306 |
| 9                | 1                | 0              | -1.923157               | -1.605997 | -0.820293 |
| 10               | 8                | 0              | 1.302430                | -1.619231 | 0.347487  |
| 11               | 1                | 0              | 0.974985                | -2.483571 | 0.618485  |
| 12               | 8                | 0              | -1.325817               | -0.595382 | 1.521155  |
| 13               | 1                | 0              | -1.915518               | 0.113031  | 1.804966  |
| 14               | 1                | 0              | -1.006579               | -1.025375 | 2.321940  |
| 15               | 1                | 0              | -1.013008               | -1.497691 | -2.065055 |
| 16               | 1                | 0              | -0.948699               | 2.540485  | -0.304729 |
| 17               | 1                | 0              | 1.933270                | 1.223455  | -1.309233 |
| 18               | 1                | 0              | 1.919209                | -1.772181 | -0.377885 |
| 19               | 1                | 0              | 0.975383                | 1.759449  | 1.842956  |

**8 membered protonated water cluster : 001aab\_5\_H2O\_+3H2O\_+H+\_M062X\_6311++2d2p\_PCMw.log**

orientation:

| Center<br>Number | Atomic<br>Number | Atomic<br>Type | Coordinates (Angstroms) |           |           |
|------------------|------------------|----------------|-------------------------|-----------|-----------|
|                  |                  |                | X                       | Y         | Z         |
| 1                | 8                | 0              | -2.108543               | -2.085739 | 0.069068  |
| 2                | 1                | 0              | -0.846857               | -1.606691 | 0.726539  |
| 3                | 8                | 0              | 0.022571                | -1.299415 | 1.172632  |
| 4                | 1                | 0              | 0.038047                | -0.290542 | 1.233144  |
| 5                | 8                | 0              | 0.067339                | 1.269756  | 1.307429  |
| 6                | 1                | 0              | -0.706480               | 1.650172  | 0.816052  |
| 7                | 8                | 0              | -2.004820               | 2.226238  | -0.032309 |
| 8                | 1                | 0              | -2.516769               | 1.522799  | -0.464900 |
| 9                | 8                | 0              | -3.455881               | 0.048566  | -1.114420 |
| 10               | 1                | 0              | -2.629331               | -1.368271 | -0.337794 |
| 11               | 8                | 0              | 2.496691                | 2.045948  | 0.049794  |
| 12               | 1                | 0              | 0.005283                | 1.590294  | 2.212837  |
| 13               | 1                | 0              | 2.345513                | 2.832294  | -0.480637 |
| 14               | 1                | 0              | -2.699718               | -2.546110 | 0.671788  |
| 15               | 1                | 0              | -4.389140               | 0.100576  | -0.882832 |
| 16               | 1                | 0              | 0.858143                | -1.650990 | 0.646368  |
| 17               | 1                | 0              | 1.651465                | 1.855516  | 0.488405  |
| 18               | 1                | 0              | -1.780877               | 2.856665  | -0.721987 |
| 19               | 8                | 0              | 1.986324                | -2.164382 | -0.068839 |
| 20               | 1                | 0              | 2.494881                | -1.449409 | -0.533165 |
| 21               | 1                | 0              | 2.605378                | -2.615111 | 0.512679  |
| 22               | 8                | 0              | 3.222077                | -0.197195 | -1.331928 |
| 23               | 1                | 0              | 4.180098                | -0.262305 | -1.355295 |
| 24               | 1                | 0              | 3.015687                | 0.639872  | -0.867253 |
| 25               | 1                | 0              | -3.431401               | -0.008983 | -2.075370 |

**free probe C: \_801aad\_GFP\_bipiridil\_M06\_2X\_6311++2d2p\_PCMw.log**

Standard orientation:

| Center<br>Number | Atomic<br>Number | Atomic<br>Type | Coordinates (Angstroms) |           |           |
|------------------|------------------|----------------|-------------------------|-----------|-----------|
|                  |                  |                | X                       | Y         | Z         |
| 1                | 6                | 0              | 3.685183                | -2.051734 | 0.178691  |
| 2                | 6                | 0              | 2.385436                | -2.528721 | 0.224275  |
| 3                | 6                | 0              | 1.327735                | -1.638422 | 0.150185  |
| 4                | 6                | 0              | 1.611477                | -0.272986 | 0.030691  |
| 5                | 6                | 0              | 3.882942                | -0.676085 | 0.058901  |
| 6                | 6                | 0              | 0.580685                | 0.756972  | -0.057215 |
| 7                | 6                | 0              | -0.753952               | 0.608624  | -0.047470 |
| 8                | 1                | 0              | 0.945894                | 1.772249  | -0.143659 |
| 9                | 7                | 0              | -1.534015               | -0.537696 | 0.050511  |
| 10               | 6                | 0              | -1.656785               | 1.803569  | -0.159833 |
| 11               | 8                | 0              | -1.396466               | 2.976019  | -0.285443 |
| 12               | 6                | 0              | -2.773576               | -0.127162 | 0.009163  |
| 13               | 7                | 0              | -2.920470               | 1.243655  | -0.091655 |
| 14               | 7                | 0              | -3.831903               | -0.952683 | 0.044110  |
| 15               | 1                | 0              | -3.603601               | -1.932036 | -0.044811 |
| 16               | 6                | 0              | -5.198936               | -0.578017 | 0.041969  |
| 17               | 6                | 0              | -6.075638               | -1.240733 | -0.812212 |
| 18               | 6                | 0              | -5.671911               | 0.405820  | 0.905978  |
| 19               | 6                | 0              | -7.421972               | -0.908084 | -0.808741 |
| 20               | 1                | 0              | -5.697724               | -2.007310 | -1.474512 |
| 21               | 6                | 0              | -7.017192               | 0.750108  | 0.882648  |
| 22               | 1                | 0              | -4.999202               | 0.880333  | 1.606963  |
| 23               | 6                | 0              | -7.895435               | 0.095371  | 0.029085  |
| 24               | 1                | 0              | -8.099805               | -1.427149 | -1.471353 |
| 25               | 1                | 0              | -7.379117               | 1.518993  | 1.550213  |
| 26               | 1                | 0              | -8.943143               | 0.359142  | 0.021901  |
| 27               | 1                | 0              | -3.783904               | 1.745378  | -0.226825 |
| 28               | 1                | 0              | 4.535538                | -2.712118 | 0.232712  |
| 29               | 1                | 0              | 2.197400                | -3.589344 | 0.316926  |
| 30               | 1                | 0              | 0.303465                | -1.972382 | 0.181932  |
| 31               | 7                | 0              | 2.871612                | 0.187478  | -0.012868 |
| 32               | 6                | 0              | 5.262241                | -0.105717 | 0.004658  |
| 33               | 6                | 0              | 5.462105                | 1.268651  | -0.116382 |
| 34               | 6                | 0              | 6.758760                | 1.753580  | -0.164761 |
| 35               | 1                | 0              | 4.610156                | 1.927478  | -0.169977 |
| 36               | 6                | 0              | 7.518472                | -0.493877 | 0.029429  |
| 37               | 6                | 0              | 7.814672                | 0.857343  | -0.090906 |
| 38               | 1                | 0              | 6.941806                | 2.814853  | -0.258716 |
| 39               | 1                | 0              | 8.315620                | -1.224542 | 0.090542  |
| 40               | 1                | 0              | 8.841749                | 1.188851  | -0.124848 |
| 41               | 7                | 0              | 6.277740                | -0.972403 | 0.076778  |

**free probe B: \_801abe\_GFP\_bipiridil\_M062X\_6311++2d2p\_PCMw.log**

Standard orientation:

| Center<br>Number | Atomic<br>Number | Atomic<br>Type | Coordinates (Angstroms) |           |           |
|------------------|------------------|----------------|-------------------------|-----------|-----------|
|                  |                  |                | X                       | Y         | Z         |
| 1                | 6                | 0              | 4.705349                | -0.455827 | -0.131484 |
| 2                | 6                | 0              | 4.867843                | -1.834809 | -0.150587 |
| 3                | 6                | 0              | 3.758013                | -2.660257 | -0.082827 |
| 4                | 6                | 0              | 2.497375                | -2.064161 | -0.001808 |
| 5                | 6                | 0              | 3.412654                | 0.059121  | -0.034650 |
| 6                | 6                | 0              | 1.263891                | -2.843681 | 0.044679  |
| 7                | 6                | 0              | 0.045184                | -2.289383 | 0.047056  |
| 8                | 1                | 0              | 1.316714                | -3.923215 | 0.066460  |
| 9                | 7                | 0              | -0.317662               | -0.957013 | 0.008258  |
| 10               | 6                | 0              | -1.275516               | -3.019132 | 0.077948  |
| 11               | 8                | 0              | -1.409255               | -4.226720 | 0.117369  |
| 12               | 6                | 0              | -1.684063               | -0.904722 | 0.011264  |
| 13               | 7                | 0              | -2.286470               | -2.081569 | 0.052149  |
| 14               | 7                | 0              | -2.275930               | 0.295835  | -0.027322 |
| 15               | 1                | 0              | -1.645241               | 1.083649  | -0.062833 |
| 16               | 6                | 0              | -3.647457               | 0.628612  | -0.025105 |
| 17               | 6                | 0              | -3.953424               | 1.990432  | -0.065901 |
| 18               | 6                | 0              | -4.674234               | -0.312614 | 0.015182  |
| 19               | 6                | 0              | -5.273186               | 2.408656  | -0.066254 |
| 20               | 1                | 0              | -3.153146               | 2.718557  | -0.096947 |
| 21               | 6                | 0              | -5.993731               | 0.124628  | 0.014412  |
| 22               | 1                | 0              | -4.443055               | -1.362904 | 0.046304  |
| 23               | 6                | 0              | -6.304130               | 1.476575  | -0.025771 |
| 24               | 1                | 0              | -5.494038               | 3.466137  | -0.097987 |
| 25               | 1                | 0              | -6.785806               | -0.610502 | 0.045958  |
| 26               | 1                | 0              | -7.334423               | 1.801604  | -0.025766 |
| 27               | 1                | 0              | 5.566308                | 0.189972  | -0.201620 |
| 28               | 1                | 0              | 5.858622                | -2.260129 | -0.224190 |
| 29               | 1                | 0              | 3.854256                | -3.736086 | -0.100427 |
| 30               | 7                | 0              | 2.352489                | -0.736536 | 0.026900  |
| 31               | 6                | 0              | 3.108393                | 1.522439  | 0.000567  |
| 32               | 6                | 0              | 4.108524                | 2.475886  | 0.175152  |
| 33               | 6                | 0              | 3.762189                | 3.817985  | 0.203307  |
| 34               | 1                | 0              | 5.139163                | 2.182231  | 0.300856  |
| 35               | 6                | 0              | 1.499724                | 3.150363  | -0.105812 |
| 36               | 6                | 0              | 2.430255                | 4.169099  | 0.057643  |
| 37               | 1                | 0              | 4.522274                | 4.573813  | 0.340814  |
| 38               | 1                | 0              | 0.448594                | 3.385909  | -0.220100 |
| 39               | 1                | 0              | 2.111953                | 5.200626  | 0.072863  |
| 40               | 7                | 0              | 1.818285                | 1.859545  | -0.133275 |
| 41               | 1                | 0              | 0.354968                | -0.192997 | -0.011382 |

**free probe A:** \_801ace\_GFP\_bipiridil\_M062X\_6311++2d2p\_PCMw.log

Standard orientation:

| Center<br>Number | Atomic<br>Number | Atomic<br>Type | Coordinates (Angstroms) |           |           |
|------------------|------------------|----------------|-------------------------|-----------|-----------|
|                  |                  |                | X                       | Y         | Z         |
| 1                | 6                | 0              | -4.687787               | -0.768410 | 0.148912  |
| 2                | 6                | 0              | -4.705385               | -2.157216 | 0.129451  |
| 3                | 6                | 0              | -3.516327               | -2.857451 | 0.025455  |
| 4                | 6                | 0              | -2.325140               | -2.129706 | -0.050172 |
| 5                | 6                | 0              | -3.458011               | -0.118004 | 0.053106  |
| 6                | 6                | 0              | -1.023658               | -2.779951 | -0.129979 |
| 7                | 6                | 0              | 0.137204                | -2.107864 | -0.123009 |
| 8                | 1                | 0              | -0.969246               | -3.857775 | -0.184023 |
| 9                | 7                | 0              | 0.385482                | -0.754238 | -0.046106 |
| 10               | 6                | 0              | 1.482660                | -2.759792 | -0.193096 |
| 11               | 8                | 0              | 1.742841                | -3.935623 | -0.283432 |
| 12               | 6                | 0              | 1.732824                | -0.480865 | -0.053020 |
| 13               | 7                | 0              | 2.376402                | -1.717685 | -0.133365 |
| 14               | 7                | 0              | 2.226979                | 0.687999  | -0.020607 |
| 15               | 6                | 0              | 3.626009                | 0.853709  | 0.022340  |
| 16               | 6                | 0              | 4.233332                | 1.680551  | -0.924777 |
| 17               | 6                | 0              | 4.412520                | 0.276230  | 1.023122  |
| 18               | 6                | 0              | 5.602578                | 1.899404  | -0.888724 |
| 19               | 1                | 0              | 3.618717                | 2.142105  | -1.685217 |
| 20               | 6                | 0              | 5.782713                | 0.503586  | 1.056043  |
| 21               | 1                | 0              | 3.942660                | -0.332478 | 1.784809  |
| 22               | 6                | 0              | 6.385097                | 1.310843  | 0.099415  |
| 23               | 1                | 0              | 6.060050                | 2.535688  | -1.633754 |
| 24               | 1                | 0              | 6.377858                | 0.051938  | 1.837706  |
| 25               | 1                | 0              | 7.450842                | 1.487089  | 0.128058  |
| 26               | 1                | 0              | -5.609282               | -0.216942 | 0.251084  |
| 27               | 1                | 0              | -5.644846               | -2.686519 | 0.202497  |
| 28               | 1                | 0              | -3.497778               | -3.937552 | 0.011508  |
| 29               | 7                | 0              | -2.318085               | -0.793187 | -0.041423 |
| 30               | 6                | 0              | -3.318393               | 1.370044  | 0.056224  |
| 31               | 6                | 0              | -4.412347               | 2.208483  | -0.145724 |
| 32               | 6                | 0              | -4.218875               | 3.581237  | -0.136566 |
| 33               | 1                | 0              | -5.396153               | 1.802359  | -0.323320 |
| 34               | 6                | 0              | -1.909582               | 3.164767  | 0.257189  |
| 35               | 6                | 0              | -2.941928               | 4.076163  | 0.072011  |
| 36               | 1                | 0              | -5.052883               | 4.249979  | -0.295340 |
| 37               | 1                | 0              | -0.896721               | 3.512939  | 0.418937  |
| 38               | 1                | 0              | -2.741817               | 5.137017  | 0.087756  |
| 39               | 7                | 0              | -2.081633               | 1.846262  | 0.249201  |
| 40               | 1                | 0              | -0.350561               | -0.056721 | 0.008431  |
| 41               | 1                | 0              | 3.377380                | -1.824745 | -0.184786 |

**Complex A:** \_803aae\_GFP\_bipiridil\_Zn2+\_M062X\_6311++2d2p\_PCMw.log

Standard orientation:

| Center<br>Number | Atomic<br>Number | Atomic<br>Type | Coordinates (Angstroms) |           |           |
|------------------|------------------|----------------|-------------------------|-----------|-----------|
|                  |                  |                | X                       | Y         | Z         |
| 1                | 6                | 0              | 4.588515                | 1.334359  | -0.040113 |
| 2                | 6                | 0              | 4.344948                | 2.699331  | -0.079353 |
| 3                | 6                | 0              | 3.042186                | 3.156639  | -0.084821 |
| 4                | 6                | 0              | 1.996345                | 2.231893  | -0.053316 |
| 5                | 6                | 0              | 3.506510                | 0.465696  | -0.008313 |
| 6                | 6                | 0              | 0.624351                | 2.712761  | -0.059019 |
| 7                | 6                | 0              | -0.508447               | 2.000349  | -0.061188 |
| 8                | 1                | 0              | 0.492407                | 3.786477  | -0.062154 |
| 9                | 7                | 0              | -0.732309               | 0.624176  | -0.061672 |
| 10               | 6                | 0              | -1.843490               | 2.679147  | -0.063276 |
| 11               | 8                | 0              | -2.112611               | 3.847973  | -0.078228 |
| 12               | 6                | 0              | -2.053092               | 0.442787  | -0.064641 |
| 13               | 7                | 0              | -2.741951               | 1.618985  | -0.048100 |
| 14               | 7                | 0              | -2.657283               | -0.732039 | -0.089878 |
| 15               | 1                | 0              | -2.074491               | -1.546109 | -0.221429 |
| 16               | 6                | 0              | -4.074448               | -0.920774 | -0.023946 |
| 17               | 6                | 0              | -4.704999               | -1.629431 | -1.037966 |
| 18               | 6                | 0              | -4.790354               | -0.421300 | 1.056968  |
| 19               | 6                | 0              | -6.075512               | -1.833775 | -0.968447 |
| 20               | 1                | 0              | -4.126259               | -2.009613 | -1.867881 |
| 21               | 6                | 0              | -6.164736               | -0.613205 | 1.105159  |
| 22               | 1                | 0              | -4.276243               | 0.096997  | 1.855025  |
| 23               | 6                | 0              | -6.806721               | -1.320184 | 0.096487  |
| 24               | 1                | 0              | -6.572535               | -2.386475 | -1.752456 |
| 25               | 1                | 0              | -6.727831               | -0.222586 | 1.940285  |
| 26               | 1                | 0              | -7.875026               | -1.475122 | 0.142289  |
| 27               | 1                | 0              | -3.746204               | 1.708116  | -0.098903 |
| 28               | 1                | 0              | 5.600985                | 0.966837  | -0.034785 |
| 29               | 1                | 0              | 5.169687                | 3.396177  | -0.104755 |
| 30               | 1                | 0              | 2.818635                | 4.212291  | -0.114116 |
| 31               | 7                | 0              | 2.245679                | 0.913956  | -0.015582 |
| 32               | 6                | 0              | 3.672691                | -1.014633 | 0.037216  |
| 33               | 6                | 0              | 4.914362                | -1.633094 | 0.052104  |
| 34               | 6                | 0              | 4.981389                | -3.017203 | 0.096889  |
| 35               | 1                | 0              | 5.821652                | -1.052736 | 0.029657  |
| 36               | 6                | 0              | 2.606028                | -3.077115 | 0.108023  |
| 37               | 6                | 0              | 3.810424                | -3.756375 | 0.125947  |
| 38               | 1                | 0              | 5.942860                | -3.509243 | 0.108973  |
| 39               | 1                | 0              | 1.662712                | -3.601908 | 0.128683  |
| 40               | 1                | 0              | 3.819815                | -4.834338 | 0.161429  |
| 41               | 7                | 0              | 2.545368                | -1.743575 | 0.064619  |
| 42               | 30               | 0              | 0.798617                | -0.666610 | 0.025463  |

**Complex B:** \_803bae\_GFP\_bipiridil-H+\_Zn2+\_M062X\_6311++2d2p\_PCMw.log

Standard orientation:

| Center<br>Number | Atomic<br>Number | Atomic<br>Type | Coordinates (Angstroms) |           |           |
|------------------|------------------|----------------|-------------------------|-----------|-----------|
|                  |                  |                | X                       | Y         | Z         |
| 1                | 6                | 0              | 4.569764                | 1.308309  | -0.001616 |
| 2                | 6                | 0              | 4.334211                | 2.681159  | -0.033442 |
| 3                | 6                | 0              | 3.041469                | 3.149907  | -0.058124 |
| 4                | 6                | 0              | 1.973216                | 2.236908  | -0.049415 |
| 5                | 6                | 0              | 3.480892                | 0.456178  | 0.004759  |
| 6                | 6                | 0              | 0.614291                | 2.726607  | -0.075816 |
| 7                | 6                | 0              | -0.520026               | 1.993586  | -0.072731 |
| 8                | 1                | 0              | 0.482739                | 3.798783  | -0.101154 |
| 9                | 7                | 0              | -0.724077               | 0.643811  | -0.042776 |
| 10               | 6                | 0              | -1.870165               | 2.661513  | -0.109117 |
| 11               | 8                | 0              | -2.126282               | 3.841587  | -0.154876 |
| 12               | 6                | 0              | -2.078514               | 0.390796  | -0.049140 |
| 13               | 7                | 0              | -2.752190               | 1.617556  | -0.081685 |
| 14               | 7                | 0              | -2.584656               | -0.778055 | -0.052506 |
| 15               | 6                | 0              | -3.984436               | -0.928641 | -0.000831 |
| 16               | 6                | 0              | -4.621657               | -1.678614 | -0.991683 |
| 17               | 6                | 0              | -4.747439               | -0.406082 | 1.048206  |
| 18               | 6                | 0              | -5.994620               | -1.873666 | -0.950168 |
| 19               | 1                | 0              | -4.027618               | -2.097451 | -1.792239 |
| 20               | 6                | 0              | -6.121083               | -0.609318 | 1.086389  |
| 21               | 1                | 0              | -4.255249               | 0.144752  | 1.839290  |
| 22               | 6                | 0              | -6.752309               | -1.338651 | 0.086517  |
| 23               | 1                | 0              | -6.474948               | -2.447865 | -1.730472 |
| 24               | 1                | 0              | -6.696855               | -0.199078 | 1.904636  |
| 25               | 1                | 0              | -7.821079               | -1.495056 | 0.118110  |
| 26               | 1                | 0              | -3.754754               | 1.713458  | -0.118894 |
| 27               | 1                | 0              | 5.579070                | 0.932839  | 0.018772  |
| 28               | 1                | 0              | 5.165957                | 3.370569  | -0.038527 |
| 29               | 1                | 0              | 2.830628                | 4.208505  | -0.083754 |
| 30               | 7                | 0              | 2.220203                | 0.915492  | -0.017207 |
| 31               | 6                | 0              | 3.626304                | -1.027044 | 0.036627  |
| 32               | 6                | 0              | 4.860091                | -1.664360 | 0.037828  |
| 33               | 6                | 0              | 4.909292                | -3.048710 | 0.066388  |
| 34               | 1                | 0              | 5.774553                | -1.095144 | 0.014611  |
| 35               | 6                | 0              | 2.534232                | -3.077769 | 0.090085  |
| 36               | 6                | 0              | 3.728273                | -3.773514 | 0.093624  |
| 37               | 1                | 0              | 5.864135                | -3.553822 | 0.066478  |
| 38               | 1                | 0              | 1.583515                | -3.589606 | 0.109495  |
| 39               | 1                | 0              | 3.723575                | -4.851907 | 0.115989  |
| 40               | 7                | 0              | 2.489804                | -1.742384 | 0.062013  |
| 41               | 30               | 0              | 0.753409                | -0.641272 | 0.029725  |

**Complex C:** \_803bbe\_GFP\_bipiridil-H+\_Zn2+\_M062X\_6311++2d2p\_PCMw.log

Standard orientation:

| Center<br>Number | Atomic<br>Number | Atomic<br>Type | Coordinates (Angstroms) |           |           |
|------------------|------------------|----------------|-------------------------|-----------|-----------|
|                  |                  |                | X                       | Y         | Z         |
| 1                | 6                | 0              | 4.630231                | 1.132235  | 0.120570  |
| 2                | 6                | 0              | 4.470886                | 2.515980  | 0.096589  |
| 3                | 6                | 0              | 3.208830                | 3.061315  | 0.013808  |
| 4                | 6                | 0              | 2.094805                | 2.211154  | -0.049024 |
| 5                | 6                | 0              | 3.497907                | 0.341401  | 0.046880  |
| 6                | 6                | 0              | 0.755854                | 2.763907  | -0.097158 |
| 7                | 6                | 0              | -0.418239               | 2.103591  | -0.107726 |
| 8                | 1                | 0              | 0.679611                | 3.842568  | -0.093390 |
| 9                | 7                | 0              | -0.715592               | 0.761111  | -0.107944 |
| 10               | 6                | 0              | -1.757149               | 2.823683  | -0.090692 |
| 11               | 8                | 0              | -1.905234               | 4.031653  | -0.101043 |
| 12               | 6                | 0              | -2.087769               | 0.709624  | -0.072148 |
| 13               | 7                | 0              | -2.737469               | 1.868679  | -0.059175 |
| 14               | 7                | 0              | -2.692598               | -0.487905 | -0.055350 |
| 15               | 6                | 0              | -4.075277               | -0.775349 | 0.010675  |
| 16               | 6                | 0              | -4.495276               | -1.994221 | -0.520773 |
| 17               | 6                | 0              | -4.997134               | 0.070302  | 0.623614  |
| 18               | 6                | 0              | -5.829640               | -2.362316 | -0.448858 |
| 19               | 1                | 0              | -3.773637               | -2.649325 | -0.991054 |
| 20               | 6                | 0              | -6.332383               | -0.307543 | 0.681849  |
| 21               | 1                | 0              | -4.671780               | 1.006096  | 1.045558  |
| 22               | 6                | 0              | -6.757456               | -1.517794 | 0.148916  |
| 23               | 1                | 0              | -6.142553               | -3.309345 | -0.865240 |
| 24               | 1                | 0              | -7.043481               | 0.352523  | 1.158702  |
| 25               | 1                | 0              | -7.798476               | -1.802106 | 0.202685  |
| 26               | 1                | 0              | 5.614509                | 0.702059  | 0.200604  |
| 27               | 1                | 0              | 5.338620                | 3.157275  | 0.149714  |
| 28               | 1                | 0              | 3.061032                | 4.130701  | 0.003187  |
| 29               | 7                | 0              | 2.273745                | 0.880603  | -0.042287 |
| 30               | 6                | 0              | 3.543682                | -1.150457 | 0.075689  |
| 31               | 6                | 0              | 4.733320                | -1.863498 | 0.107766  |
| 32               | 6                | 0              | 4.692391                | -3.248764 | 0.137070  |
| 33               | 1                | 0              | 5.682672                | -1.353604 | 0.101935  |
| 34               | 6                | 0              | 2.318965                | -3.126376 | 0.098432  |
| 35               | 6                | 0              | 3.467357                | -3.896016 | 0.136528  |
| 36               | 1                | 0              | 5.612362                | -3.814463 | 0.157694  |
| 37               | 1                | 0              | 1.338020                | -3.577698 | 0.087794  |
| 38               | 1                | 0              | 3.393949                | -4.971881 | 0.158165  |
| 39               | 7                | 0              | 2.360339                | -1.792226 | 0.069579  |
| 40               | 30               | 0              | 0.754784                | -0.541018 | -0.148140 |
| 41               | 1                | 0              | -2.094921               | -1.292456 | -0.169624 |



**Complex D:** \_804aae\_GFP\_bipiridil\_Zn2+\_+3H2O\_M062X\_6311++2d2p\_PCMw.log

Standard orientation:

| Center<br>Number | Atomic<br>Number | Atomic<br>Type | Coordinates (Angstroms) |           |           |
|------------------|------------------|----------------|-------------------------|-----------|-----------|
|                  |                  |                | X                       | Y         | Z         |
| 1                | 6                | 0              | 4.528149                | 1.604038  | 0.000518  |
| 2                | 6                | 0              | 4.243385                | 2.959366  | -0.044087 |
| 3                | 6                | 0              | 2.926669                | 3.369474  | -0.076287 |
| 4                | 6                | 0              | 1.910453                | 2.411078  | -0.061406 |
| 5                | 6                | 0              | 3.476314                | 0.696832  | 0.010904  |
| 6                | 6                | 0              | 0.532453                | 2.876961  | -0.094314 |
| 7                | 6                | 0              | -0.605199               | 2.171216  | -0.079554 |
| 8                | 1                | 0              | 0.401522                | 3.950121  | -0.134791 |
| 9                | 7                | 0              | -0.832389               | 0.800280  | -0.027827 |
| 10               | 6                | 0              | -1.934276               | 2.863740  | -0.121044 |
| 11               | 8                | 0              | -2.193556               | 4.034700  | -0.184641 |
| 12               | 6                | 0              | -2.152838               | 0.631641  | -0.030917 |
| 13               | 7                | 0              | -2.839299               | 1.813239  | -0.072030 |
| 14               | 7                | 0              | -2.755449               | -0.545335 | -0.005146 |
| 15               | 1                | 0              | -2.143472               | -1.353155 | -0.072040 |
| 16               | 6                | 0              | -4.167856               | -0.747569 | 0.025560  |
| 17               | 6                | 0              | -4.744695               | -1.574068 | -0.930982 |
| 18               | 6                | 0              | -4.941407               | -0.154485 | 1.016388  |
| 19               | 6                | 0              | -6.113139               | -1.799300 | -0.897914 |
| 20               | 1                | 0              | -4.124242               | -2.028076 | -1.690958 |
| 21               | 6                | 0              | -6.313405               | -0.369161 | 1.027158  |
| 22               | 1                | 0              | -4.473100               | 0.451738  | 1.779865  |
| 23               | 6                | 0              | -6.899884               | -1.191453 | 0.073797  |
| 24               | 1                | 0              | -6.565215               | -2.443079 | -1.638568 |
| 25               | 1                | 0              | -6.918291               | 0.094535  | 1.792908  |
| 26               | 1                | 0              | -7.966459               | -1.363169 | 0.091069  |
| 27               | 1                | 0              | -3.841978               | 1.907071  | -0.135441 |
| 28               | 1                | 0              | 5.552047                | 1.271698  | 0.026395  |
| 29               | 1                | 0              | 5.044773                | 3.683413  | -0.053650 |
| 30               | 1                | 0              | 2.667189                | 4.416672  | -0.112166 |
| 31               | 7                | 0              | 2.197202                | 1.098098  | -0.018065 |
| 32               | 6                | 0              | 3.714719                | -0.775486 | 0.051671  |
| 33               | 6                | 0              | 4.990748                | -1.324225 | 0.071290  |
| 34               | 6                | 0              | 5.134815                | -2.702127 | 0.104897  |
| 35               | 1                | 0              | 5.866472                | -0.697475 | 0.059391  |
| 36               | 6                | 0              | 2.766864                | -2.885138 | 0.096077  |
| 37               | 6                | 0              | 4.004911                | -3.502726 | 0.118001  |
| 38               | 1                | 0              | 6.121663                | -3.141024 | 0.120012  |
| 39               | 1                | 0              | 1.856911                | -3.466101 | 0.105039  |
| 40               | 1                | 0              | 4.070831                | -4.579106 | 0.143853  |
| 41               | 7                | 0              | 2.625493                | -1.559104 | 0.064154  |
| 42               | 30               | 0              | 0.773605                | -0.513273 | 0.024504  |
| 43               | 8                | 0              | -0.453259               | -2.344446 | -0.078680 |
| 44               | 1                | 0              | -0.413867               | -2.811420 | -0.922235 |
| 45               | 1                | 0              | -0.525876               | -3.003146 | 0.621295  |
| 46               | 8                | 0              | 0.633040                | -0.856874 | -2.135366 |
| 47               | 1                | 0              | 1.445121                | -1.013624 | -2.629154 |
| 48               | 1                | 0              | 0.131976                | -0.205792 | -2.638631 |
| 49               | 8                | 0              | 0.620630                | -0.698753 | 2.167430  |
| 50               | 1                | 0              | -0.222622               | -0.546886 | 2.606547  |
| 51               | 1                | 0              | 1.064043                | -1.403912 | 2.650058  |

**Complex E:** \_805aae\_GFP\_bipiridil-1H+\_Zn2+\_+3H2O\_M062X\_6311++2d2p\_PCMw.log

Standard orientation:

| Center<br>Number | Atomic<br>Number | Atomic<br>Type | Coordinates (Angstroms) |           |           |
|------------------|------------------|----------------|-------------------------|-----------|-----------|
|                  |                  |                | X                       | Y         | Z         |
| 1                | 6                | 0              | 4.593039                | 1.408067  | 0.003879  |
| 2                | 6                | 0              | 4.391266                | 2.783578  | -0.008843 |
| 3                | 6                | 0              | 3.107208                | 3.276190  | -0.016613 |
| 4                | 6                | 0              | 2.021890                | 2.386042  | -0.012038 |
| 5                | 6                | 0              | 3.486865                | 0.574745  | 0.007518  |
| 6                | 6                | 0              | 0.680606                | 2.930980  | -0.016878 |
| 7                | 6                | 0              | -0.498769               | 2.281316  | -0.013824 |
| 8                | 1                | 0              | 0.608187                | 4.010006  | -0.020307 |
| 9                | 7                | 0              | -0.807336               | 0.945467  | -0.010191 |
| 10               | 6                | 0              | -1.821707               | 3.030039  | -0.012210 |
| 11               | 8                | 0              | -1.948002               | 4.242675  | -0.017543 |
| 12               | 6                | 0              | -2.180310               | 0.923270  | -0.005721 |
| 13               | 7                | 0              | -2.817178               | 2.094223  | -0.004748 |
| 14               | 7                | 0              | -2.793635               | -0.270292 | -0.005817 |
| 15               | 1                | 0              | -2.164087               | -1.062732 | -0.041120 |
| 16               | 6                | 0              | -4.163932               | -0.591132 | 0.003465  |
| 17               | 6                | 0              | -4.477955               | -1.949835 | -0.099470 |
| 18               | 6                | 0              | -5.192245               | 0.344281  | 0.119492  |
| 19               | 6                | 0              | -5.797449               | -2.368452 | -0.088809 |
| 20               | 1                | 0              | -3.680055               | -2.675897 | -0.188585 |
| 21               | 6                | 0              | -6.512109               | -0.092374 | 0.127558  |
| 22               | 1                | 0              | -4.958917               | 1.391259  | 0.200642  |
| 23               | 6                | 0              | -6.826817               | -1.440178 | 0.024175  |
| 24               | 1                | 0              | -6.019908               | -3.423167 | -0.169647 |
| 25               | 1                | 0              | -7.302139               | 0.640380  | 0.217863  |
| 26               | 1                | 0              | -7.857381               | -1.764511 | 0.032117  |
| 27               | 1                | 0              | 5.593845                | 1.011365  | 0.010339  |
| 28               | 1                | 0              | 5.237433                | 3.455254  | -0.012177 |
| 29               | 1                | 0              | 2.915687                | 4.338660  | -0.025822 |
| 30               | 7                | 0              | 2.232691                | 1.056578  | -0.000889 |
| 31               | 6                | 0              | 3.625226                | -0.910292 | 0.019885  |
| 32               | 6                | 0              | 4.862528                | -1.544515 | 0.031394  |
| 33               | 6                | 0              | 4.914891                | -2.928475 | 0.041426  |
| 34               | 1                | 0              | 5.777892                | -0.976744 | 0.032849  |
| 35               | 6                | 0              | 2.540135                | -2.951688 | 0.026925  |
| 36               | 6                | 0              | 3.733305                | -3.651483 | 0.039162  |
| 37               | 1                | 0              | 5.870271                | -3.432594 | 0.050819  |
| 38               | 1                | 0              | 1.593957                | -3.471033 | 0.023809  |
| 39               | 1                | 0              | 3.726815                | -4.730217 | 0.046362  |
| 40               | 7                | 0              | 2.485755                | -1.618619 | 0.018206  |
| 41               | 30               | 0              | 0.695427                | -0.437062 | 0.015621  |
| 42               | 8                | 0              | -0.604747               | -2.248287 | -0.122518 |
| 43               | 1                | 0              | -0.604735               | -2.668840 | -0.990554 |
| 44               | 1                | 0              | -0.728002               | -2.935638 | 0.541039  |
| 45               | 8                | 0              | 0.512524                | -0.783468 | -2.161655 |
| 46               | 1                | 0              | 1.310302                | -0.934253 | -2.679573 |
| 47               | 1                | 0              | 0.028120                | -0.080523 | -2.608352 |
| 48               | 8                | 0              | 0.559867                | -0.719211 | 2.167751  |
| 49               | 1                | 0              | -0.285267               | -0.517160 | 2.582887  |
| 50               | 1                | 0              | 0.901959                | -1.507439 | 2.601737  |

**Complex-F:** \_805abe\_GFP\_bipiridil-1H+\_Zn2+\_+3H2O\_M062X\_6311++2d2p\_PCMw.log

Standard orientation:

| Center<br>Number | Atomic<br>Number | Atomic<br>Type | Coordinates (Angstroms) |           |           |
|------------------|------------------|----------------|-------------------------|-----------|-----------|
|                  |                  |                | X                       | Y         | Z         |
| 1                | 6                | 0              | 4.528806                | 1.525096  | 0.025008  |
| 2                | 6                | 0              | 4.274779                | 2.891197  | -0.023127 |
| 3                | 6                | 0              | 2.973615                | 3.334211  | -0.076455 |
| 4                | 6                | 0              | 1.922346                | 2.403471  | -0.079050 |
| 5                | 6                | 0              | 3.454985                | 0.649921  | 0.010263  |
| 6                | 6                | 0              | 0.562356                | 2.903152  | -0.120761 |
| 7                | 6                | 0              | -0.586423               | 2.197115  | -0.079946 |
| 8                | 1                | 0              | 0.450762                | 3.976077  | -0.187799 |
| 9                | 7                | 0              | -0.802852               | 0.853317  | 0.013083  |
| 10               | 6                | 0              | -1.925470               | 2.883211  | -0.155039 |
| 11               | 8                | 0              | -2.175074               | 4.060823  | -0.252080 |
| 12               | 6                | 0              | -2.146250               | 0.627751  | -0.015327 |
| 13               | 7                | 0              | -2.821251               | 1.845443  | -0.095169 |
| 14               | 7                | 0              | -2.666465               | -0.550899 | -0.005047 |
| 15               | 6                | 0              | -4.062692               | -0.738201 | 0.026528  |
| 16               | 6                | 0              | -4.634801               | -1.631747 | -0.881197 |
| 17               | 6                | 0              | -4.879116               | -0.120720 | 0.977999  |
| 18               | 6                | 0              | -5.999442               | -1.878017 | -0.857050 |
| 19               | 1                | 0              | -3.996478               | -2.122463 | -1.603258 |
| 20               | 6                | 0              | -6.245356               | -0.371359 | 0.996019  |
| 21               | 1                | 0              | -4.437384               | 0.535163  | 1.716691  |
| 22               | 6                | 0              | -6.812644               | -1.246110 | 0.078007  |
| 23               | 1                | 0              | -6.429491               | -2.567095 | -1.570689 |
| 24               | 1                | 0              | -6.864522               | 0.112703  | 1.738542  |
| 25               | 1                | 0              | -7.875321               | -1.441113 | 0.096474  |
| 26               | 1                | 0              | 5.543513                | 1.167641  | 0.072798  |
| 27               | 1                | 0              | 5.094148                | 3.595340  | -0.016315 |
| 28               | 1                | 0              | 2.743513                | 4.388543  | -0.112283 |
| 29               | 7                | 0              | 2.183956                | 1.082554  | -0.042945 |
| 30               | 6                | 0              | 3.651894                | -0.830386 | 0.048647  |
| 31               | 6                | 0              | 4.910528                | -1.421376 | 0.067230  |
| 32               | 6                | 0              | 5.008472                | -2.803214 | 0.091950  |
| 33               | 1                | 0              | 5.806262                | -0.822985 | 0.059511  |
| 34               | 6                | 0              | 2.636095                | -2.911391 | 0.069577  |
| 35               | 6                | 0              | 3.853154                | -3.569010 | 0.091367  |
| 36               | 1                | 0              | 5.980558                | -3.274248 | 0.107369  |
| 37               | 1                | 0              | 1.702696                | -3.457329 | 0.057840  |
| 38               | 1                | 0              | 3.886534                | -4.647208 | 0.105112  |
| 39               | 7                | 0              | 2.542151                | -1.581590 | 0.054061  |
| 40               | 30               | 0              | 0.711993                | -0.506760 | 0.008831  |
| 41               | 8                | 0              | -0.603327               | -2.198160 | -0.055689 |
| 42               | 1                | 0              | -1.489327               | -1.704643 | -0.036351 |
| 43               | 1                | 0              | -0.598770               | -2.769973 | 0.717998  |
| 44               | 8                | 0              | 0.593437                | -0.824671 | -2.193835 |
| 45               | 1                | 0              | 1.386783                | -0.686806 | -2.721268 |
| 46               | 1                | 0              | 0.324792                | -1.737196 | -2.348372 |
| 47               | 8                | 0              | 0.723163                | -0.589729 | 2.234014  |
| 48               | 1                | 0              | -0.130870               | -0.425618 | 2.647465  |
| 49               | 1                | 0              | 1.100612                | -1.350683 | 2.686877  |
| 50               | 1                | 0              | -3.821180               | 1.945243  | -0.170291 |
